# Supplementary material
Source: publisher figshare collection journal article supplement (https://acs.figshare.com/ndownloader/files/3914683)
Supplement: Supplementary file 1 [file 3914683]

 
data_1 
 
_audit_creation_method            SHELXL-97 
_chemical_name_systematic 
; 
 ? 
; 
_chemical_name_common             ? 
_chemical_melting_point           ? 
_chemical_formula_moiety          ? 
_chemical_formula_sum 
 'C24 H8 O16 S4 Zn3' 
_chemical_formula_weight          876.79 
 
loop_ 
 _atom_type_symbol 
 _atom_type_description 
 _atom_type_scat_dispersion_real 
 _atom_type_scat_dispersion_imag 
 _atom_type_scat_source 
 'C'  'C'   0.0033   0.0016 
 'International Tables Vol C Tables 4.2.6.8 and 6.1.1.4' 
 'H'  'H'   0.0000   0.0000 
 'International Tables Vol C Tables 4.2.6.8 and 6.1.1.4' 
 'O'  'O'   0.0106   0.0060 
 'International Tables Vol C Tables 4.2.6.8 and 6.1.1.4' 
 'S'  'S'   0.1246   0.1234 
 'International Tables Vol C Tables 4.2.6.8 and 6.1.1.4' 
 'Zn'  'Zn'   0.2839   1.4301 
 'International Tables Vol C Tables 4.2.6.8 and 6.1.1.4' 
 
_symmetry_cell_setting            Orthorhombic 
_symmetry_space_group_name_H-M    Fddd 
 
loop_ 
 _symmetry_equiv_pos_as_xyz 
 'x, y, z' 
 '-x+1/4, -y+1/4, z' 
 'x, -y+1/4, -z+1/4' 
 '-x+1/4, y, -z+1/4' 
 'x, y+1/2, z+1/2' 
 '-x+1/4, -y+3/4, z+1/2' 
 'x, -y+3/4, -z+3/4' 
 '-x+1/4, y+1/2, -z+3/4' 
 'x+1/2, y, z+1/2' 
 '-x+3/4, -y+1/4, z+1/2' 
 'x+1/2, -y+1/4, -z+3/4' 
 '-x+3/4, y, -z+3/4' 
 'x+1/2, y+1/2, z' 
 '-x+3/4, -y+3/4, z' 
 'x+1/2, -y+3/4, -z+1/4' 
 '-x+3/4, y+1/2, -z+1/4' 
 '-x, -y, -z' 
 'x-1/4, y-1/4, -z' 
 '-x, y-1/4, z-1/4' 
 'x-1/4, -y, z-1/4' 
 '-x, -y+1/2, -z+1/2' 
 'x-1/4, y+1/4, -z+1/2' 
 '-x, y+1/4, z+1/4' 
 'x-1/4, -y+1/2, z+1/4' 
 '-x+1/2, -y, -z+1/2' 
 'x+1/4, y-1/4, -z+1/2' 
 '-x+1/2, y-1/4, z+1/4' 
 'x+1/4, -y, z+1/4' 
 '-x+1/2, -y+1/2, -z' 
 'x+1/4, y+1/4, -z' 
 '-x+1/2, y+1/4, z-1/4' 
 'x+1/4, -y+1/2, z-1/4' 
 
_cell_length_a                    33.1272(12) 
_cell_length_b                    65.1158(10) 
_cell_length_c                    19.1804(3) 
_cell_angle_alpha                 90.00 
_cell_angle_beta                  90.00 
_cell_angle_gamma                 90.00 
_cell_volume                      41374.1(18) 
_cell_formula_units_Z             32 
_cell_measurement_temperature     100.00(11) 
_cell_measurement_reflns_used     13050 
_cell_measurement_theta_min       2.8200 
_cell_measurement_theta_max       25.4760 
 
_exptl_crystal_description        block 
_exptl_crystal_colour             colourless 
_exptl_crystal_size_max           0.30 
_exptl_crystal_size_mid           0.20 
_exptl_crystal_size_min           0.20 
_exptl_crystal_density_meas       1.1157(1) 
_exptl_crystal_density_diffrn     1.116 
_exptl_crystal_density_method     'not measured' 
_exptl_crystal_F_000              13632 
_exptl_absorpt_coefficient_mu     1.586 
_exptl_absorpt_correction_type    'multi-scan' 
_exptl_absorpt_correction_T_min   0.35648 
_exptl_absorpt_correction_T_max   1.00000 
_exptl_absorpt_process_details    none 
 
_exptl_special_details 
; 
 ? 
; 
 
_diffrn_ambient_temperature       100.00(11) 
_diffrn_radiation_wavelength      0.71073 
_diffrn_radiation_type            MoK\a 
_diffrn_radiation_source          'SuperNova (Mo) X-ray Source' 
_diffrn_radiation_monochromator   'mirror' 
_diffrn_measurement_device_type   'SuperNova, Dual, Cu at zero, Atlas' 
_diffrn_measurement_method        '\w scans' 
_diffrn_detector_area_resol_mean  none  
_diffrn_standards_number          none 
_diffrn_standards_interval_count  none 
_diffrn_standards_interval_time   none 
_diffrn_standards_decay_%         none
_diffrn_reflns_number             23187 
_diffrn_reflns_av_R_equivalents   0.0388 
_diffrn_reflns_av_sigmaI/netI     0.0423 
_diffrn_reflns_limit_h_min        -32 
_diffrn_reflns_limit_h_max        34 
_diffrn_reflns_limit_k_min        -65 
_diffrn_reflns_limit_k_max        68 
_diffrn_reflns_limit_l_min        -20 
_diffrn_reflns_limit_l_max        19 
_diffrn_reflns_theta_min          2.45 
_diffrn_reflns_theta_max          22.00 
_reflns_number_total              6345 
_reflns_number_gt                 5440 
_reflns_threshold_expression      >2sigma(I) 
 
_computing_data_collection        'Bruker XSCANS' 
_computing_cell_refinement        'Bruker XSCANS' 
_computing_data_reduction         'Bruker SHELXTL' 
_computing_structure_solution     'SHELXS-97 (Sheldrick, 1990)' 
_computing_structure_refinement   'SHELXL-97 (Sheldrick, 1997)' 
_computing_molecular_graphics     'Bruker SHELXTL' 
_computing_publication_material   'Bruker SHELXTL' 
 
_refine_special_details 
; 
 Refinement of F^2^ against ALL reflections.  The weighted R-factor wR and 
 goodness of fit S are based on F^2^, conventional R-factors R are based 
 on F, with F set to zero for negative F^2^. The threshold expression of 
 F^2^ > 2sigma(F^2^) is used only for calculating R-factors(gt) etc. and is 
 not relevant to the choice of reflections for refinement.  R-factors based 
 on F^2^ are statistically about twice as large as those based on F, and R- 
 factors based on ALL data will be even larger. 
; 
 
_refine_ls_structure_factor_coef  Fsqd  
_refine_ls_matrix_type            full 
_refine_ls_weighting_scheme       calc  
_refine_ls_weighting_details 
 'calc w=1/[\s^2^(Fo^2^)+(0.1421P)^2^+2808.0000P] where P=(Fo^2^+2Fc^2^)/3' 
_atom_sites_solution_primary      direct 
_atom_sites_solution_secondary    difmap 
_atom_sites_solution_hydrogens    none 
_refine_ls_hydrogen_treatment     none 
_refine_ls_extinction_method      none 
_refine_ls_extinction_coef        ? 
_refine_ls_number_reflns          6345 
_refine_ls_number_parameters      478 
_refine_ls_number_restraints      568 
_refine_ls_R_factor_all           0.1258 
_refine_ls_R_factor_gt            0.1166 
_refine_ls_wR_factor_ref          0.3022 
_refine_ls_wR_factor_gt           0.2954 
_refine_ls_goodness_of_fit_ref    1.042 
_refine_ls_restrained_S_all       1.045 
_refine_ls_shift/su_max           0.017 
_refine_ls_shift/su_mean          0.000 
 
loop_ 
 _atom_site_label 
 _atom_site_type_symbol 
 _atom_site_fract_x 
 _atom_site_fract_y 
 _atom_site_fract_z 
 _atom_site_U_iso_or_equiv 
 _atom_site_adp_type 
 _atom_site_occupancy 
 _atom_site_symmetry_multiplicity 
 _atom_site_calc_flag 
 _atom_site_refinement_flags 
 _atom_site_disorder_assembly 
 _atom_site_disorder_group 
Zn1 Zn 0.50213(4) 0.057929(19) 0.31253(7) 0.0377(4) Uani 1 1 d . . . 
Zn2 Zn 0.26950(4) -0.00923(2) 0.00879(7) 0.0400(5) Uani 1 1 d U . . 
Zn3 Zn 0.24480(5) 0.04157(3) -0.01375(10) 0.0716(7) Uani 1 1 d U . . 
S1 S 0.39099(13) 0.02133(6) 0.1297(2) 0.0684(11) Uani 1 1 d . . . 
S2 S 0.49482(17) 0.12816(8) 0.3992(3) 0.1009(16) Uani 1 1 d U . . 
S3 S 0.1293(18) 0.02666(13) 0.124(3) 0.088(8) Uani 0.50 1 d P . . 
S4 S 0.6292(7) 0.03565(7) 0.1324(12) 0.025(3) Uani 0.50 1 d PU . . 
S6 S 0.5153(3) -0.00494(13) 0.4720(4) 0.071(2) Uani 0.50 1 d P . . 
S5 S 0.2711(3) -0.00630(12) -0.2320(4) 0.065(2) Uani 0.50 1 d P . . 
O1 O 0.3153(3) 0.00870(14) 0.0483(5) 0.064(2) Uani 1 1 d U . . 
O2 O 0.2926(3) 0.04179(16) 0.0403(6) 0.077(2) Uani 1 1 d U . . 
O12 O 0.5476(3) 0.06144(15) 0.2488(5) 0.071(2) Uani 1 1 d U . . 
O11 O 0.5597(3) 0.02846(13) 0.2203(5) 0.059(2) Uani 1 1 d U . . 
O3 O 0.4559(3) 0.05427(17) 0.2492(6) 0.081(2) Uani 1 1 d U . . 
O4 O 0.4703(3) 0.02358(16) 0.2061(6) 0.074(2) Uani 1 1 d U . . 
O16 O 0.4696(4) 0.0421(2) 0.4069(7) 0.097(3) Uani 1 1 d U . . 
O6 O 0.4748(5) 0.1724(2) 0.4184(8) 0.118(4) Uani 1 1 d U . . 
O15 O 0.5212(3) 0.02981(15) 0.3550(5) 0.069(2) Uani 1 1 d U . . 
O14 O 0.2692(4) 0.01042(17) -0.0794(6) 0.082(2) Uani 1 1 d U . . 
O13 O 0.2257(4) 0.0326(2) -0.1146(7) 0.101(3) Uani 1 1 d U . . 
O10 O 0.2234(4) 0.00292(17) 0.0623(6) 0.083(2) Uani 1 1 d U . . 
O9 O 0.1972(4) 0.03206(17) 0.0363(7) 0.088(2) Uani 1 1 d U . . 
O8 O 0.4935(3) 0.08619(16) 0.3435(6) 0.081(2) Uani 1 1 d U . . 
O7 O 0.5485(4) 0.0752(2) 0.4062(7) 0.104(3) Uani 1 1 d U . . 
O5 O 0.5228(5) 0.1807(2) 0.4765(9) 0.121(4) Uani 1 1 d U . . 
C18 C 0.5665(4) 0.04749(17) 0.2173(7) 0.050(3) Uani 1 1 d U . . 
C15 C 0.1953(4) 0.01492(19) 0.0635(7) 0.051(3) Uani 1 1 d U . . 
C5 C 0.3180(4) 0.0275(2) 0.0605(8) 0.064(3) Uani 1 1 d U . . 
C1 C 0.3516(4) 0.0352(2) 0.1030(8) 0.062(3) Uani 1 1 d U . . 
C16 C 0.5973(4) 0.05373(17) 0.1655(8) 0.053(3) Uani 1 1 d U . . 
C6 C 0.4490(4) 0.0400(2) 0.2123(8) 0.061(3) Uani 1 1 d U . . 
C13 C 0.1572(4) 0.00963(19) 0.0954(7) 0.051(3) Uani 1 1 d U . . 
C12 C 0.5263(6) 0.0901(3) 0.3912(11) 0.088(3) Uani 1 1 d U . . 
C2 C 0.3569(4) 0.0546(2) 0.1259(8) 0.062(2) Uani 1 1 d U . . 
C4 C 0.4119(4) 0.0416(2) 0.1720(8) 0.063(3) Uani 1 1 d U . . 
C10 C 0.5262(6) 0.1096(3) 0.4209(11) 0.092(3) Uani 1 1 d U . . 
C14 C 0.1448(5) -0.0097(2) 0.1049(9) 0.072(3) Uani 1 1 d U . . 
C17 C 0.6102(4) 0.07330(19) 0.1502(9) 0.065(3) Uani 1 1 d U . . 
C7 C 0.5175(6) 0.1428(3) 0.4292(11) 0.092(3) Uani 1 1 d U . . 
C3 C 0.3874(5) 0.0585(2) 0.1663(9) 0.071(3) Uani 1 1 d U . . 
C9 C 0.5578(6) 0.1165(3) 0.4638(11) 0.098(3) Uani 1 1 d U . . 
C8 C 0.5513(6) 0.1390(3) 0.4749(11) 0.098(3) Uani 1 1 d U . . 
C11 C 0.5059(7) 0.1671(3) 0.4556(13) 0.101(4) Uani 1 1 d U . . 
C21 C 0.2484(4) 0.0170(2) -0.1260(7) 0.056(3) Uani 1 1 d U . . 
C20 C 0.2439(9) 0.0140(5) -0.1986(14) 0.053(4) Uani 0.50 1 d PU . . 
C20A C 0.2524(9) 0.0018(5) -0.1879(15) 0.054(4) Uani 0.50 1 d PU . . 
C24 C 0.4958(5) 0.0296(2) 0.4034(8) 0.062(3) Uani 1 1 d U . . 
C23A C 0.5488(9) 0.0007(4) 0.4585(14) 0.055(4) Uani 0.50 1 d PU . . 
C23 C 0.4487(9) 0.0146(4) 0.4965(14) 0.057(4) Uani 0.50 1 d PU . . 
C22A C 0.5152(9) 0.0139(4) 0.4608(14) 0.054(4) Uani 0.50 1 d PU . . 
C22 C 0.4821(10) 0.0130(4) 0.4533(15) 0.059(4) Uani 0.50 1 d PU . . 
C19A C 0.2204(9) 0.0238(4) -0.2398(14) 0.057(4) Uani 0.50 1 d PU . . 
C19 C 0.2783(9) -0.0152(4) -0.1854(15) 0.056(4) Uani 0.50 1 d PU . . 
 
loop_ 
 _atom_site_aniso_label 
 _atom_site_aniso_U_11 
 _atom_site_aniso_U_22 
 _atom_site_aniso_U_33 
 _atom_site_aniso_U_23 
 _atom_site_aniso_U_13 
 _atom_site_aniso_U_12 
Zn1 0.0403(8) 0.0290(8) 0.0438(8) -0.0088(6) 0.0078(6) 0.0018(6) 
Zn2 0.0497(9) 0.0325(8) 0.0377(8) 0.0027(6) 0.0013(6) 0.0105(6) 
Zn3 0.0481(10) 0.0762(13) 0.0904(14) 0.0476(11) -0.0133(9) -0.0135(8) 
S1 0.076(3) 0.060(2) 0.069(2) 0.0019(19) -0.012(2) 0.0008(19) 
S2 0.112(4) 0.081(3) 0.110(4) -0.015(3) 0.018(3) 0.006(3) 
S3 0.06(2) 0.054(4) 0.147(8) 0.030(14) 0.038(9) -0.015(11) 
S4 0.023(8) 0.023(2) 0.029(8) 0.000(3) -0.015(5) 0.002(3) 
S6 0.097(6) 0.063(5) 0.053(4) -0.008(4) 0.032(4) -0.004(4) 
S5 0.084(6) 0.059(5) 0.053(4) 0.013(4) -0.003(4) 0.019(4) 
O1 0.067(5) 0.043(4) 0.083(5) 0.008(4) -0.007(4) 0.003(4) 
O2 0.080(4) 0.060(4) 0.093(5) 0.009(4) -0.007(4) 0.001(4) 
O12 0.076(4) 0.058(4) 0.078(4) -0.016(4) 0.022(4) -0.006(4) 
O11 0.063(4) 0.047(4) 0.068(5) -0.008(4) 0.021(4) -0.009(4) 
O3 0.085(4) 0.069(4) 0.089(4) -0.011(4) 0.001(4) 0.002(4) 
O4 0.076(4) 0.072(4) 0.074(4) -0.013(4) -0.005(4) -0.006(4) 
O16 0.094(5) 0.082(5) 0.114(5) -0.016(4) 0.016(4) -0.001(4) 
O6 0.126(8) 0.100(7) 0.128(8) -0.035(6) -0.018(7) 0.003(6) 
O15 0.074(4) 0.062(4) 0.071(4) -0.006(4) 0.011(4) 0.000(4) 
O14 0.090(5) 0.069(4) 0.087(5) 0.013(4) -0.008(4) -0.018(4) 
O13 0.106(5) 0.083(5) 0.113(5) 0.015(4) 0.015(5) 0.002(4) 
O10 0.085(4) 0.063(4) 0.101(5) 0.012(4) 0.018(4) 0.000(4) 
O9 0.091(5) 0.068(5) 0.104(5) 0.018(4) 0.013(5) -0.007(4) 
O8 0.090(5) 0.061(5) 0.092(5) -0.027(4) 0.025(5) 0.003(4) 
O7 0.114(6) 0.090(6) 0.107(6) -0.020(5) 0.005(5) 0.012(5) 
O5 0.128(8) 0.085(7) 0.149(8) -0.056(6) 0.023(7) -0.019(6) 
C18 0.051(6) 0.023(5) 0.077(7) -0.006(5) 0.027(5) -0.001(5) 
C15 0.055(6) 0.033(5) 0.064(6) 0.009(5) 0.007(5) -0.005(5) 
C5 0.060(6) 0.061(6) 0.070(6) -0.007(5) -0.010(5) -0.003(5) 
C1 0.051(5) 0.062(5) 0.073(6) -0.006(5) -0.002(5) -0.003(5) 
C16 0.054(6) 0.021(5) 0.083(7) -0.009(5) 0.032(5) -0.014(5) 
C6 0.057(5) 0.061(6) 0.065(6) -0.012(5) -0.009(5) 0.002(5) 
C13 0.055(6) 0.037(5) 0.060(6) -0.001(5) 0.020(5) -0.004(5) 
C12 0.086(6) 0.069(6) 0.109(7) -0.031(6) 0.024(6) 0.000(6) 
C2 0.055(4) 0.060(5) 0.071(5) -0.016(4) -0.003(4) -0.009(4) 
C4 0.053(5) 0.063(5) 0.071(5) -0.012(5) -0.004(5) -0.001(5) 
C10 0.091(6) 0.072(6) 0.113(7) -0.029(6) 0.023(6) -0.006(6) 
C14 0.069(6) 0.054(5) 0.093(6) 0.007(5) 0.022(5) -0.005(5) 
C17 0.062(6) 0.035(5) 0.097(7) -0.004(5) 0.044(6) -0.004(5) 
C7 0.084(6) 0.079(5) 0.114(6) -0.015(5) 0.022(5) -0.011(5) 
C3 0.062(5) 0.072(5) 0.078(5) -0.014(5) -0.006(5) 0.007(4) 
C9 0.096(6) 0.083(6) 0.116(7) -0.030(6) 0.019(6) -0.008(5) 
C8 0.094(6) 0.084(6) 0.116(7) -0.029(6) 0.023(6) -0.011(5) 
C11 0.095(7) 0.087(7) 0.121(8) -0.031(7) 0.025(6) -0.009(6) 
C21 0.063(7) 0.059(7) 0.047(6) 0.000(5) -0.001(5) 0.021(6) 
C20 0.061(8) 0.057(8) 0.041(6) -0.007(7) -0.009(6) 0.013(7) 
C20A 0.062(8) 0.059(8) 0.042(7) -0.007(7) -0.006(6) 0.016(7) 
C24 0.086(7) 0.041(5) 0.060(6) 0.008(5) 0.019(6) 0.005(5) 
C23A 0.073(7) 0.042(6) 0.050(7) 0.008(6) 0.012(7) 0.003(6) 
C23 0.076(7) 0.044(6) 0.052(7) 0.005(6) 0.012(7) 0.006(6) 
C22A 0.070(7) 0.043(6) 0.050(6) 0.004(5) 0.011(6) 0.006(6) 
C22 0.077(7) 0.046(6) 0.053(7) 0.006(6) 0.016(7) 0.004(6) 
C19A 0.064(8) 0.061(8) 0.045(7) -0.006(7) -0.004(6) 0.020(7) 
C19 0.065(8) 0.059(8) 0.045(7) -0.005(7) -0.007(6) 0.019(7) 
 
_geom_special_details 
; 
 All esds (except the esd in the dihedral angle between two l.s. planes) 
 are estimated using the full covariance matrix.  The cell esds are taken 
 into account individually in the estimation of esds in distances, angles 
 and torsion angles; correlations between esds in cell parameters are only 
 used when they are defined by crystal symmetry.  An approximate (isotropic) 
 treatment of cell esds is used for estimating esds involving l.s. planes. 
; 
 
loop_ 
 _geom_bond_atom_site_label_1 
 _geom_bond_atom_site_label_2 
 _geom_bond_distance 
 _geom_bond_site_symmetry_2 
 _geom_bond_publ_flag 
Zn1 O12 1.953(10) . ? 
Zn1 O8 1.955(10) . ? 
Zn1 O3 1.969(12) . ? 
Zn1 O15 2.101(10) . ? 
Zn1 O16 2.345(13) . ? 
Zn1 C24 2.546(14) . ? 
Zn2 O11 1.972(9) 20 ? 
Zn2 O10 2.003(12) . ? 
Zn2 O1 2.058(10) . ? 
Zn2 O14 2.121(11) . ? 
Zn2 O4 2.132(11) 20 ? 
Zn2 O15 2.282(10) 20 ? 
Zn3 O2 1.891(11) . ? 
Zn3 O5 1.909(14) 10_554 ? 
Zn3 O9 1.947(11) . ? 
Zn3 O13 2.117(15) . ? 
S1 C1 1.666(15) . ? 
S1 C4 1.698(15) . ? 
S2 C7 1.34(2) . ? 
S2 C10 1.65(2) . ? 
S3 S3 0.29(11) 4 ? 
S3 C13 1.54(4) . ? 
S3 C13 1.74(4) 4 ? 
S4 S4 0.40(4) 4_655 ? 
S4 C16 1.68(2) 4_655 ? 
S4 C16 1.70(2) . ? 
S6 C23A 1.20(3) . ? 
S6 C22A 1.24(3) . ? 
S6 C23 1.48(3) 17_656 ? 
S6 C22 1.53(3) 17_656 ? 
S6 S6 1.612(15) 17_656 ? 
S6 C22 1.64(3) . ? 
S6 C22A 1.74(3) 17_656 ? 
S5 C19 1.09(3) . ? 
S5 C20A 1.17(3) . ? 
S5 C19A 1.29(3) 25_554 ? 
S5 C20 1.51(3) 25_554 ? 
S5 C20 1.73(3) . ? 
S5 C20A 1.75(3) 25_554 ? 
S5 S5 1.764(15) 25_554 ? 
O1 C5 1.250(17) . ? 
O2 C5 1.313(18) . ? 
O12 C18 1.258(15) . ? 
O11 C18 1.261(14) . ? 
O11 Zn2 1.972(9) 28 ? 
O3 C6 1.189(17) . ? 
O4 C6 1.289(17) . ? 
O4 Zn2 2.132(11) 28 ? 
O16 C24 1.194(18) . ? 
O6 C11 1.30(3) . ? 
O15 C24 1.252(17) . ? 
O15 Zn2 2.282(10) 28 ? 
O14 C21 1.206(17) . ? 
O13 C21 1.287(17) . ? 
O10 C15 1.214(16) . ? 
O9 C15 1.234(16) . ? 
O8 C12 1.44(2) . ? 
O7 C12 1.25(2) . ? 
O5 C11 1.12(2) . ? 
O5 Zn3 1.909(14) 10 ? 
C18 C16 1.481(17) . ? 
C15 C13 1.444(18) . ? 
C5 C1 1.47(2) . ? 
C1 C2 1.354(19) . ? 
C16 C17 1.375(17) . ? 
C16 S4 1.68(2) 4_655 ? 
C6 C4 1.46(2) . ? 
C13 C14 1.337(18) . ? 
C13 S3 1.74(4) 4 ? 
C12 C10 1.39(2) . ? 
C2 C3 1.30(2) . ? 
C4 C3 1.37(2) . ? 
C10 C9 1.41(3) . ? 
C14 C14 1.52(3) 4 ? 
C17 C17 1.38(3) 4_655 ? 
C7 C8 1.44(3) . ? 
C7 C11 1.71(3) . ? 
C9 C8 1.50(3) . ? 
C21 C20 1.41(3) . ? 
C21 C20A 1.55(3) . ? 
C20 C20A 0.87(3) . ? 
C20 C19A 1.28(4) . ? 
C20 S5 1.51(3) 25_554 ? 
C20A C19 1.40(4) . ? 
C20A S5 1.75(3) 25_554 ? 
C20A C19A 2.04(4) . ? 
C24 C22 1.51(3) . ? 
C24 C22A 1.63(3) . ? 
C23A C23 1.32(4) 17_656 ? 
C23A C22A 1.41(4) . ? 
C23 C23A 1.32(4) 17_656 ? 
C23 C22 1.39(4) . ? 
C23 S6 1.48(3) 17_656 ? 
C22A C22 1.11(4) . ? 
C22A S6 1.74(3) 17_656 ? 
C22 S6 1.53(3) 17_656 ? 
C19A S5 1.29(3) 25_554 ? 
C19A C19 1.54(4) 25_554 ? 
C19 C19A 1.54(4) 25_554 ? 
 
loop_ 
 _geom_angle_atom_site_label_1 
 _geom_angle_atom_site_label_2 
 _geom_angle_atom_site_label_3 
 _geom_angle 
 _geom_angle_site_symmetry_1 
 _geom_angle_site_symmetry_3 
 _geom_angle_publ_flag 
O12 Zn1 O8 101.1(4) . . ? 
O12 Zn1 O3 103.2(5) . . ? 
O8 Zn1 O3 100.8(5) . . ? 
O12 Zn1 O15 96.5(4) . . ? 
O8 Zn1 O15 138.3(5) . . ? 
O3 Zn1 O15 111.6(4) . . ? 
O12 Zn1 O16 152.8(5) . . ? 
O8 Zn1 O16 96.4(5) . . ? 
O3 Zn1 O16 93.8(5) . . ? 
O15 Zn1 O16 57.1(4) . . ? 
O12 Zn1 C24 125.2(5) . . ? 
O8 Zn1 C24 117.5(5) . . ? 
O3 Zn1 C24 105.7(5) . . ? 
O15 Zn1 C24 29.3(4) . . ? 
O16 Zn1 C24 27.9(4) . . ? 
O11 Zn2 O10 163.3(4) 20 . ? 
O11 Zn2 O1 90.0(4) 20 . ? 
O10 Zn2 O1 98.6(4) . . ? 
O11 Zn2 O14 95.0(4) 20 . ? 
O10 Zn2 O14 99.6(5) . . ? 
O1 Zn2 O14 87.4(4) . . ? 
O11 Zn2 O4 93.5(4) 20 20 ? 
O10 Zn2 O4 80.4(5) . 20 ? 
O1 Zn2 O4 170.3(4) . 20 ? 
O14 Zn2 O4 83.3(4) . 20 ? 
O11 Zn2 O15 85.0(4) 20 20 ? 
O10 Zn2 O15 80.6(4) . 20 ? 
O1 Zn2 O15 91.0(4) . 20 ? 
O14 Zn2 O15 178.4(4) . 20 ? 
O4 Zn2 O15 98.3(4) 20 20 ? 
O2 Zn3 O5 107.6(6) . 10_554 ? 
O2 Zn3 O9 114.2(5) . . ? 
O5 Zn3 O9 95.9(6) 10_554 . ? 
O2 Zn3 O13 138.8(5) . . ? 
O5 Zn3 O13 94.5(6) 10_554 . ? 
O9 Zn3 O13 96.9(5) . . ? 
C1 S1 C4 92.6(7) . . ? 
C7 S2 C10 93.4(11) . . ? 
S3 S3 C13 130(9) 4 . ? 
S3 S3 C13 42(7) 4 4 ? 
C13 S3 C13 94.6(10) . 4 ? 
S4 S4 C16 86(6) 4_655 4_655 ? 
S4 S4 C16 80(6) 4_655 . ? 
C16 S4 C16 90.4(8) 4_655 . ? 
C23A S6 C22A 70.3(19) . . ? 
C23A S6 C23 58.0(17) . 17_656 ? 
C22A S6 C23 119.4(19) . 17_656 ? 
C23A S6 C22 104.8(19) . 17_656 ? 
C22A S6 C22 120.0(18) . 17_656 ? 
C23 S6 C22 54.9(15) 17_656 17_656 ? 
C23A S6 S6 127.2(16) . 17_656 ? 
C22A S6 S6 73.7(14) . 17_656 ? 
C23 S6 S6 113.9(13) 17_656 17_656 ? 
C22 S6 S6 63.1(12) 17_656 17_656 ? 
C23A S6 C22 110.8(17) . . ? 
C22A S6 C22 42.3(16) . . ? 
C23 S6 C22 158.6(17) 17_656 . ? 
C22 S6 C22 119.1(12) 17_656 . ? 
S6 S6 C22 56.0(11) 17_656 . ? 
C23A S6 C22A 143.3(18) . 17_656 ? 
C22A S6 C22A 117.1(13) . 17_656 ? 
C23 S6 C22A 91.3(15) 17_656 17_656 ? 
C22 S6 C22A 38.9(14) 17_656 17_656 ? 
S6 S6 C22A 43.4(10) 17_656 17_656 ? 
C22 S6 C22A 90.7(13) . 17_656 ? 
C19 S5 C20A 76(2) . . ? 
C19 S5 C19A 80.1(19) . 25_554 ? 
C20A S5 C19A 145(2) . 25_554 ? 
C19 S5 C20 128(2) . 25_554 ? 
C20A S5 C20 127.8(19) . 25_554 ? 
C19A S5 C20 53.6(17) 25_554 25_554 ? 
C19 S5 C20 102.6(18) . . ? 
C20A S5 C20 27.2(17) . . ? 
C19A S5 C20 161.0(18) 25_554 . ? 
C20 S5 C20 114.3(12) 25_554 . ? 
C19 S5 C20A 155(2) . 25_554 ? 
C20A S5 C20A 108.9(15) . 25_554 ? 
C19A S5 C20A 82.8(16) 25_554 25_554 ? 
C20 S5 C20A 29.8(12) 25_554 25_554 ? 
C20 S5 C20A 88.0(12) . 25_554 ? 
C19 S5 S5 137.8(18) . 25_554 ? 
C20A S5 S5 69.8(15) . 25_554 ? 
C19A S5 S5 114.7(14) 25_554 25_554 ? 
C20 S5 S5 63.1(12) 25_554 25_554 ? 
C20 S5 S5 51.2(10) . 25_554 ? 
C20A S5 S5 39.1(10) 25_554 25_554 ? 
C5 O1 Zn2 132.7(9) . . ? 
C5 O2 Zn3 133.9(10) . . ? 
C18 O12 Zn1 126.9(9) . . ? 
C18 O11 Zn2 139.6(8) . 28 ? 
C6 O3 Zn1 127.7(11) . . ? 
C6 O4 Zn2 137.8(9) . 28 ? 
C24 O16 Zn1 85.5(10) . . ? 
C24 O15 Zn1 95.4(9) . . ? 
C24 O15 Zn2 125.2(10) . 28 ? 
Zn1 O15 Zn2 101.0(4) . 28 ? 
C21 O14 Zn2 143.8(11) . . ? 
C21 O13 Zn3 101.4(10) . . ? 
C15 O10 Zn2 148.0(11) . . ? 
C15 O9 Zn3 122.5(10) . . ? 
C12 O8 Zn1 104.4(10) . . ? 
C11 O5 Zn3 129.1(18) . 10 ? 
O11 C18 O12 126.8(11) . . ? 
O11 C18 C16 115.0(10) . . ? 
O12 C18 C16 117.9(10) . . ? 
O10 C15 O9 122.3(13) . . ? 
O10 C15 C13 121.6(12) . . ? 
O9 C15 C13 116.0(13) . . ? 
O1 C5 O2 126.3(13) . . ? 
O1 C5 C1 119.4(14) . . ? 
O2 C5 C1 114.3(13) . . ? 
C2 C1 C5 126.6(14) . . ? 
C2 C1 S1 107.7(11) . . ? 
C5 C1 S1 125.6(11) . . ? 
C17 C16 C18 127.7(11) . . ? 
C17 C16 S4 112.8(11) . 4_655 ? 
C18 C16 S4 119.5(10) . 4_655 ? 
C17 C16 S4 111.6(11) . . ? 
C18 C16 S4 119.2(11) . . ? 
S4 C16 S4 13.4(12) 4_655 . ? 
O3 C6 O4 126.6(14) . . ? 
O3 C6 C4 115.0(14) . . ? 
O4 C6 C4 118.4(13) . . ? 
C14 C13 C15 123.5(13) . . ? 
C14 C13 S3 116.3(18) . . ? 
C15 C13 S3 120.2(16) . . ? 
C14 C13 S3 109.8(14) . 4 ? 
C15 C13 S3 126.8(15) . 4 ? 
S3 C13 S3 7(3) . 4 ? 
O7 C12 C10 128(2) . . ? 
O7 C12 O8 116.9(15) . . ? 
C10 C12 O8 114.8(17) . . ? 
C3 C2 C1 118.4(15) . . ? 
C3 C4 C6 127.0(14) . . ? 
C3 C4 S1 110.1(11) . . ? 
C6 C4 S1 122.7(11) . . ? 
C9 C10 C12 122.2(19) . . ? 
C9 C10 S2 112.5(14) . . ? 
C12 C10 S2 124.5(17) . . ? 
C13 C14 C14 109.6(9) . 4 ? 
C17 C17 C16 111.8(8) 4_655 . ? 
S2 C7 C8 125.2(17) . . ? 
S2 C7 C11 131.3(17) . . ? 
C8 C7 C11 98.6(16) . . ? 
C2 C3 C4 110.8(14) . . ? 
C10 C9 C8 106.9(19) . . ? 
C7 C8 C9 100.9(17) . . ? 
O5 C11 O6 113(2) . . ? 
O5 C11 C7 137(2) . . ? 
O6 C11 C7 105.0(18) . . ? 
O14 C21 O13 119.2(14) . . ? 
O14 C21 C20 138.0(18) . . ? 
O13 C21 C20 102.3(17) . . ? 
O14 C21 C20A 107.1(16) . . ? 
O13 C21 C20A 133.3(17) . . ? 
C20 C21 C20A 33.7(13) . . ? 
C20A C20 C19A 143(4) . . ? 
C20A C20 C21 82(3) . . ? 
C19A C20 C21 127(3) . . ? 
C20A C20 S5 91(3) . 25_554 ? 
C19A C20 S5 54.5(16) . 25_554 ? 
C21 C20 S5 162(3) . 25_554 ? 
C20A C20 S5 38(2) . . ? 
C19A C20 S5 118(2) . . ? 
C21 C20 S5 114(2) . . ? 
S5 C20 S5 65.7(12) 25_554 . ? 
C20 C20A S5 114(4) . . ? 
C20 C20A C19 159(4) . . ? 
S5 C20A C19 49.1(17) . . ? 
C20 C20A C21 65(3) . . ? 
S5 C20A C21 152(3) . . ? 
C19 C20A C21 122(2) . . ? 
C20 C20A S5 60(3) . 25_554 ? 
S5 C20A S5 71.1(15) . 25_554 ? 
C19 C20A S5 116(2) . 25_554 ? 
C21 C20A S5 122(2) . 25_554 ? 
C20 C20A C19A 22(2) . . ? 
S5 C20A C19A 104(2) . . ? 
C19 C20A C19A 153(2) . . ? 
C21 C20A C19A 83.3(17) . . ? 
S5 C20A C19A 38.9(10) 25_554 . ? 
O16 C24 O15 121.6(14) . . ? 
O16 C24 C22 103.5(17) . . ? 
O15 C24 C22 132.7(16) . . ? 
O16 C24 C22A 132.5(16) . . ? 
O15 C24 C22A 104.1(15) . . ? 
C22 C24 C22A 40.9(14) . . ? 
O16 C24 Zn1 66.7(9) . . ? 
O15 C24 Zn1 55.2(7) . . ? 
C22 C24 Zn1 167.1(16) . . ? 
C22A C24 Zn1 152.0(14) . . ? 
S6 C23A C23 72(2) . 17_656 ? 
S6 C23A C22A 56.5(18) . . ? 
C23 C23A C22A 119(3) 17_656 . ? 
C23A C23 C22 106(3) 17_656 . ? 
C23A C23 S6 50.2(17) 17_656 17_656 ? 
C22 C23 S6 64.4(18) . 17_656 ? 
C22 C22A S6 89(3) . . ? 
C22 C22A C23A 138(3) . . ? 
S6 C22A C23A 53.2(16) . . ? 
C22 C22A C24 64(2) . . ? 
S6 C22A C24 137(2) . . ? 
C23A C22A C24 132(2) . . ? 
C22 C22A S6 60(2) . 17_656 ? 
S6 C22A S6 62.9(13) . 17_656 ? 
C23A C22A S6 106(2) . 17_656 ? 
C24 C22A S6 118.8(19) . 17_656 ? 
C22A C22 C23 135(3) . . ? 
C22A C22 C24 75(2) . . ? 
C23 C22 C24 124(2) . . ? 
C22A C22 S6 81(2) . 17_656 ? 
C23 C22 S6 60.7(16) . 17_656 ? 
C24 C22 S6 145(2) . 17_656 ? 
C22A C22 S6 49.2(19) . . ? 
C23 C22 S6 117(2) . . ? 
C24 C22 S6 116(2) . . ? 
S6 C22 S6 60.9(12) 17_656 . ? 
C20 C19A S5 72.0(19) . 25_554 ? 
C20 C19A C19 112(2) . 25_554 ? 
S5 C19A C19 44.2(14) 25_554 25_554 ? 
C20 C19A C20A 14.8(17) . . ? 
S5 C19A C20A 58.3(13) 25_554 . ? 
C19 C19A C20A 100.8(18) 25_554 . ? 
S5 C19 C20A 54.5(18) . . ? 
S5 C19 C19A 55.6(16) . 25_554 ? 
C20A C19 C19A 106(2) . 25_554 ? 
 
_diffrn_measured_fraction_theta_max    0.998 
_diffrn_reflns_theta_full              22.00 
_diffrn_measured_fraction_theta_full   0.998 
_refine_diff_density_max    1.224 
_refine_diff_density_min   -1.526 
_refine_diff_density_rms    0.152 

loop_
  _platon_squeeze_void_nr
  _platon_squeeze_void_average_x
  _platon_squeeze_void_average_y
  _platon_squeeze_void_average_z
  _platon_squeeze_void_volume
  _platon_squeeze_void_count_electrons
         1     0.026     0.059    -0.009   21469.5    4190.1
_platon_squeeze_details
;

;
# start Validation Reply Form
_vrf_THETM01_I
;
PROBLEM: The value of sine(theta_max)/wavelength is less than 0.550
RESPONSE: The crystal under investigation showed no significant intensity
above 0.95\A resolution.
;
_vrf_PLAT023_I
;
PROBLEM: Resolution (too) Low [sin(theta)/Lambda < 0.6]..      22.00 Deg. 
RESPONSE:  The crystal under investigation showed no significant intensity
above 0.95\A resolution.
;
# end Validation Reply Form

#end

 
data_2 
 
_audit_creation_method            SHELXL-97 
_chemical_name_systematic 
; 
 ? 
; 
_chemical_name_common             ? 
_chemical_melting_point           ? 
_chemical_formula_moiety          ? 
_chemical_formula_sum 
 'C24 H8 O16 S4 Zn3' 
_chemical_formula_weight          876.65 
 
loop_ 
 _atom_type_symbol 
 _atom_type_description 
 _atom_type_scat_dispersion_real 
 _atom_type_scat_dispersion_imag 
 _atom_type_scat_source 
 'C'  'C'   0.0033   0.0016 
 'International Tables Vol C Tables 4.2.6.8 and 6.1.1.4' 
 'H'  'H'   0.0000   0.0000 
 'International Tables Vol C Tables 4.2.6.8 and 6.1.1.4' 
 'O'  'O'   0.0106   0.0060 
 'International Tables Vol C Tables 4.2.6.8 and 6.1.1.4' 
 'S'  'S'   0.1246   0.1234 
 'International Tables Vol C Tables 4.2.6.8 and 6.1.1.4' 
 'Zn'  'Zn'   0.2839   1.4301 
 'International Tables Vol C Tables 4.2.6.8 and 6.1.1.4' 
 
_symmetry_cell_setting            Orthorhombic 
_symmetry_space_group_name_H-M    Pnc2 
 
loop_ 
 _symmetry_equiv_pos_as_xyz 
 'x, y, z' 
 '-x, -y, z' 
 'x, -y+1/2, z+1/2' 
 '-x, y+1/2, z+1/2' 
 
_cell_length_a                    14.6561(5) 
_cell_length_b                    23.4491(6) 
_cell_length_c                    16.0392(7) 
_cell_angle_alpha                 90.00 
_cell_angle_beta                  90.00 
_cell_angle_gamma                 90.00 
_cell_volume                      5512.2(3) 
_cell_formula_units_Z             4 
_cell_measurement_temperature     293(2) 
_cell_measurement_reflns_used     4272
_cell_measurement_theta_min       2.5346 
_cell_measurement_theta_max       27.7484
 
_exptl_crystal_description        block 
_exptl_crystal_colour             colourless 
_exptl_crystal_size_max           0.32 
_exptl_crystal_size_mid           0.24 
_exptl_crystal_size_min           0.16 
_exptl_crystal_density_meas       1.0565(1) 
_exptl_crystal_density_diffrn     1.056 
_exptl_crystal_density_method     'not measured' 
_exptl_crystal_F_000              1736 
_exptl_absorpt_coefficient_mu     1.488 
_exptl_absorpt_correction_type    'multi-scan' 
_exptl_absorpt_correction_T_min   0.80801 
_exptl_absorpt_correction_T_max   1.00000 
_exptl_absorpt_process_details    none
 
_exptl_special_details 
; 
 ? 
; 
 
_diffrn_ambient_temperature       293(2) 
_diffrn_radiation_wavelength      0.71073 
_diffrn_radiation_type            MoK\a 
_diffrn_radiation_source          'fine-focus sealed tube' 
_diffrn_radiation_monochromator   graphite 
_diffrn_measurement_device_type   'Xcalibur, Eos' 
_diffrn_measurement_method        '\w scans' 
_diffrn_detector_area_resol_mean  none  
_diffrn_standards_number          none 
_diffrn_standards_interval_count  none 
_diffrn_standards_interval_time   none 
_diffrn_standards_decay_%         none
_diffrn_reflns_number             11346 
_diffrn_reflns_av_R_equivalents   0.0209 
_diffrn_reflns_av_sigmaI/netI     0.0321 
_diffrn_reflns_limit_h_min        -17 
_diffrn_reflns_limit_h_max        11 
_diffrn_reflns_limit_k_min        -27 
_diffrn_reflns_limit_k_max        27 
_diffrn_reflns_limit_l_min        -18 
_diffrn_reflns_limit_l_max        7 
_diffrn_reflns_theta_min          2.54 
_diffrn_reflns_theta_max          25.00 
_reflns_number_total              6337 
_reflns_number_gt                 5340 
_reflns_threshold_expression      >2sigma(I) 
 
_computing_data_collection        'Bruker XSCANS' 
_computing_cell_refinement        'Bruker XSCANS' 
_computing_data_reduction         'Bruker SHELXTL' 
_computing_structure_solution     'SHELXS-97 (Sheldrick, 1990)' 
_computing_structure_refinement   'SHELXL-97 (Sheldrick, 1997)' 
_computing_molecular_graphics     'Bruker SHELXTL' 
_computing_publication_material   'Bruker SHELXTL'
 
_refine_special_details 
; 
 Refinement of F^2^ against ALL reflections.  The weighted R-factor wR and 
 goodness of fit S are based on F^2^, conventional R-factors R are based 
 on F, with F set to zero for negative F^2^. The threshold expression of 
 F^2^ > 2sigma(F^2^) is used only for calculating R-factors(gt) etc. and is 
 not relevant to the choice of reflections for refinement.  R-factors based 
 on F^2^ are statistically about twice as large as those based on F, and R- 
 factors based on ALL data will be even larger. 
; 
 
_refine_ls_structure_factor_coef  Fsqd  
_refine_ls_matrix_type            full 
_refine_ls_weighting_scheme       calc  
_refine_ls_weighting_details 
 'calc w=1/[\s^2^(Fo^2^)+(0.0761P)^2^+0.0000P] where P=(Fo^2^+2Fc^2^)/3' 
_atom_sites_solution_primary      direct 
_atom_sites_solution_secondary    difmap 
_atom_sites_solution_hydrogens    geom 
_refine_ls_hydrogen_treatment     mixed 
_refine_ls_extinction_method      none 
_refine_ls_extinction_coef        ? 
_refine_ls_abs_structure_details 
 'Flack H D (1983), Acta Cryst. A39, 876-881' 
_refine_ls_abs_structure_Flack    0.426(15) 
_refine_ls_number_reflns          6337 
_refine_ls_number_parameters      425 
_refine_ls_number_restraints      1 
_refine_ls_R_factor_all           0.0467 
_refine_ls_R_factor_gt            0.0387 
_refine_ls_wR_factor_ref          0.1121 
_refine_ls_wR_factor_gt           0.1078 
_refine_ls_goodness_of_fit_ref    1.025 
_refine_ls_restrained_S_all       1.025 
_refine_ls_shift/su_max           0.001 
_refine_ls_shift/su_mean          0.000 
 
loop_ 
 _atom_site_label 
 _atom_site_type_symbol 
 _atom_site_fract_x 
 _atom_site_fract_y 
 _atom_site_fract_z 
 _atom_site_U_iso_or_equiv 
 _atom_site_adp_type 
 _atom_site_occupancy 
 _atom_site_symmetry_multiplicity 
 _atom_site_calc_flag 
 _atom_site_refinement_flags 
 _atom_site_disorder_assembly 
 _atom_site_disorder_group 
Zn1 Zn 0.88248(4) 0.36605(2) 0.05774(5) 0.03657(16) Uani 1 1 d . . . 
Zn2 Zn 0.62738(4) 0.61430(2) -0.44387(5) 0.03650(16) Uani 1 1 d . . . 
Zn3 Zn 1.0000 0.5000 0.10651(6) 0.02425(18) Uani 1 2 d S . . 
Zn4 Zn 0.5000 0.5000 -0.39452(6) 0.02684(19) Uani 1 2 d S . . 
O1 O 0.5033(2) 0.09134(15) 0.1048(3) 0.0563(11) Uani 1 1 d . . . 
O2 O 0.5053(3) 0.1484(2) -0.0073(4) 0.0692(15) Uani 1 1 d . . . 
O3 O 0.8159(3) 0.29436(18) 0.0462(3) 0.0633(13) Uani 1 1 d . . . 
O4 O 0.9058(4) 0.2519(3) 0.1382(5) 0.129(3) Uani 1 1 d . . . 
O5 O 0.6030(3) 0.50499(16) -0.3085(3) 0.0421(10) Uani 1 1 d . . . 
O6 O 0.6860(3) 0.58247(19) -0.3434(3) 0.0657(14) Uani 1 1 d . . . 
O7 O 0.8279(3) 0.4113(2) -0.0343(3) 0.0669(14) Uani 1 1 d . . . 
O8 O 0.9105(4) 0.4839(3) 0.0074(3) 0.095(2) Uani 1 1 d . . . 
O9 O 0.9429(3) 0.57987(17) 0.1155(3) 0.0771(16) Uani 1 1 d . . . 
O10 O 0.9888(3) 0.65071(17) 0.0350(4) 0.0624(15) Uani 1 1 d . . . 
O11 O 0.6950(3) 0.81523(17) 0.0472(4) 0.0663(13) Uani 1 1 d . . . 
O12 O 0.5877(5) 0.7763(3) 0.1280(5) 0.149(3) Uani 1 1 d . . . 
O13 O 1.0975(3) 0.52117(18) 0.1922(3) 0.0573(12) Uani 1 1 d . . . 
O14 O 1.1610(3) 0.60588(17) 0.1619(3) 0.0567(12) Uani 1 1 d . . . 
O15 O 1.3257(3) 0.43259(17) 0.4644(3) 0.0537(12) Uani 1 1 d . . . 
O16 O 1.4040(3) 0.50883(16) 0.5069(3) 0.0475(11) Uani 1 1 d . . . 
C1 C 1.3509(4) 0.4850(3) 0.4596(4) 0.0423(14) Uani 1 1 d . . . 
C2 C 0.6672(4) 0.5393(2) -0.2996(4) 0.0420(14) Uani 1 1 d . . . 
C3 C 0.8560(5) 0.4607(4) -0.0392(4) 0.0592(19) Uani 1 1 d . . . 
C4 C 0.5436(4) 0.1276(2) 0.0544(6) 0.0523(17) Uani 1 1 d . . . 
C5 C 0.8422(4) 0.6527(2) 0.0902(5) 0.0544(18) Uani 1 1 d . . . 
C6 C 1.1547(4) 0.5603(3) 0.2021(4) 0.0496(16) Uani 1 1 d . . . 
C7 C 0.7674(6) 0.6321(3) 0.1277(7) 0.103(4) Uani 1 1 d . . . 
H7A H 0.7635 0.5957 0.1504 0.124 Uiso 1 1 calc R . . 
C8 C 0.7964(5) 0.5682(3) -0.2024(5) 0.082(3) Uani 1 1 d . . . 
H8A H 0.8088 0.6030 -0.2280 0.098 Uiso 1 1 calc R . . 
C9 C 1.3111(4) 0.5187(3) 0.3913(4) 0.0515(17) Uani 1 1 d . . . 
C10 C 0.6955(5) 0.1244(3) 0.1337(6) 0.077(3) Uani 1 1 d . . . 
H10A H 0.6855 0.0905 0.1623 0.093 Uiso 1 1 calc R . . 
C11 C 1.2821(5) 0.5917(3) 0.2982(5) 0.067(2) Uani 1 1 d . . . 
H11A H 1.2919 0.6267 0.2723 0.080 Uiso 1 1 calc R . . 
C12 C 1.3318(5) 0.5726(3) 0.3681(4) 0.065(2) Uani 1 1 d . . . 
H12A H 1.3747 0.5950 0.3957 0.078 Uiso 1 1 calc R . . 
C13 C 0.8177(4) 0.4965(3) -0.1087(4) 0.0540(18) Uani 1 1 d . . . 
C14 C 0.9320(4) 0.6245(2) 0.0789(4) 0.0475(17) Uani 1 1 d . . . 
C15 C 0.7708(4) 0.2056(3) 0.0952(5) 0.0597(18) Uani 1 1 d . . . 
C16 C 0.6359(4) 0.1464(2) 0.0771(4) 0.0476(17) Uani 1 1 d . . . 
C17 C 0.7740(5) 0.1582(3) 0.1445(6) 0.091(3) Uani 1 1 d . . . 
H17A H 0.8218 0.1494 0.1805 0.109 Uiso 1 1 calc R . . 
C18 C 0.7163(5) 0.7211(3) 0.0940(6) 0.075(2) Uani 1 1 d . . . 
C19 C 0.7312(4) 0.5319(3) -0.2295(4) 0.0508(16) Uani 1 1 d . . . 
C20 C 1.2185(4) 0.5538(2) 0.2727(4) 0.0510(17) Uani 1 1 d . . . 
C21 C 0.8436(5) 0.5484(3) -0.1317(5) 0.085(3) Uani 1 1 d . . . 
H21A H 0.8882 0.5694 -0.1041 0.102 Uiso 1 1 calc R . . 
C22 C 0.8356(5) 0.2563(3) 0.0908(5) 0.068(2) Uani 1 1 d . . . 
C23 C 0.6619(6) 0.7768(3) 0.0883(6) 0.075(2) Uani 1 1 d . . . 
C24 C 0.6960(6) 0.6715(4) 0.1287(7) 0.117(4) Uani 1 1 d . . . 
H24A H 0.6392 0.6635 0.1517 0.140 Uiso 1 1 calc R . . 
S1 S 0.73168(10) 0.47069(7) -0.17016(11) 0.0468(4) Uani 1 1 d . . . 
S2 S 1.22592(11) 0.49151(6) 0.32915(11) 0.0491(4) Uani 1 1 d . . . 
S3 S 0.67438(11) 0.20883(6) 0.03939(12) 0.0572(5) Uani 1 1 d . . . 
S4 S 0.82518(11) 0.72095(6) 0.05587(14) 0.0593(5) Uani 1 1 d . . . 
 
loop_ 
 _atom_site_aniso_label 
 _atom_site_aniso_U_11 
 _atom_site_aniso_U_22 
 _atom_site_aniso_U_33 
 _atom_site_aniso_U_23 
 _atom_site_aniso_U_13 
 _atom_site_aniso_U_12 
Zn1 0.0359(3) 0.0379(3) 0.0359(4) -0.0036(4) 0.0004(4) -0.0078(2) 
Zn2 0.0384(3) 0.0311(3) 0.0400(4) 0.0013(4) 0.0008(4) -0.0081(2) 
Zn3 0.0224(4) 0.0239(3) 0.0265(4) 0.000 0.000 0.0009(3) 
Zn4 0.0255(4) 0.0305(4) 0.0245(4) 0.000 0.000 0.0001(3) 
O1 0.056(2) 0.042(2) 0.071(3) -0.019(3) 0.025(2) -0.0103(19) 
O2 0.065(3) 0.057(3) 0.086(4) 0.016(3) -0.010(3) 0.002(2) 
O3 0.072(3) 0.052(2) 0.065(3) 0.003(3) -0.005(3) -0.026(2) 
O4 0.113(5) 0.122(5) 0.151(7) 0.034(5) -0.065(5) -0.055(4) 
O5 0.038(2) 0.049(2) 0.039(3) 0.008(2) -0.013(2) -0.0003(18) 
O6 0.064(3) 0.073(3) 0.060(3) 0.027(3) -0.022(3) -0.016(3) 
O7 0.065(3) 0.075(3) 0.061(3) 0.013(3) -0.018(3) -0.003(3) 
O8 0.093(4) 0.127(5) 0.064(4) 0.024(4) -0.051(3) -0.047(4) 
O9 0.091(3) 0.044(2) 0.097(4) 0.024(3) 0.025(3) 0.038(2) 
O10 0.047(2) 0.046(2) 0.094(4) 0.017(3) -0.009(3) 0.0034(19) 
O11 0.074(3) 0.044(2) 0.081(4) -0.010(3) -0.019(3) 0.026(2) 
O12 0.127(5) 0.139(6) 0.179(8) 0.049(6) 0.062(6) 0.090(5) 
O13 0.073(3) 0.048(2) 0.051(3) 0.004(2) -0.027(3) -0.011(2) 
O14 0.076(3) 0.046(2) 0.048(3) 0.011(2) -0.031(3) -0.015(2) 
O15 0.059(3) 0.046(2) 0.056(3) 0.002(2) -0.024(2) -0.008(2) 
O16 0.052(2) 0.049(2) 0.042(3) 0.005(2) -0.022(2) -0.0077(19) 
C1 0.041(3) 0.055(4) 0.032(4) 0.007(3) -0.006(3) -0.006(3) 
C2 0.044(3) 0.048(3) 0.034(4) -0.004(3) -0.011(3) 0.005(3) 
C3 0.047(4) 0.099(6) 0.032(4) 0.013(4) -0.009(3) 0.001(4) 
C4 0.050(3) 0.031(3) 0.076(5) -0.021(4) 0.030(4) -0.009(2) 
C5 0.057(4) 0.034(3) 0.073(5) 0.009(3) 0.001(4) 0.005(3) 
C6 0.049(4) 0.063(4) 0.037(4) -0.010(3) -0.011(3) -0.002(3) 
C7 0.099(6) 0.049(4) 0.161(10) 0.054(5) 0.061(6) 0.032(4) 
C8 0.096(6) 0.071(5) 0.078(6) 0.025(4) -0.046(5) -0.049(4) 
C9 0.065(4) 0.046(3) 0.043(4) 0.002(3) -0.019(3) -0.010(3) 
C10 0.081(5) 0.060(4) 0.091(7) 0.029(4) -0.018(5) -0.027(4) 
C11 0.092(5) 0.049(4) 0.059(5) 0.015(3) -0.030(4) -0.033(4) 
C12 0.073(4) 0.060(4) 0.061(5) 0.014(4) -0.044(4) -0.028(3) 
C13 0.057(4) 0.070(4) 0.034(4) 0.007(3) -0.025(3) -0.010(3) 
C14 0.050(3) 0.031(3) 0.061(5) -0.007(3) -0.001(3) 0.009(3) 
C15 0.055(4) 0.051(3) 0.073(5) 0.008(4) -0.003(4) -0.015(3) 
C16 0.051(3) 0.042(3) 0.050(5) 0.004(3) 0.009(3) -0.001(3) 
C17 0.081(5) 0.079(5) 0.112(8) 0.032(5) -0.046(5) -0.027(4) 
C18 0.070(4) 0.070(4) 0.087(6) 0.015(4) 0.013(4) 0.034(4) 
C19 0.049(4) 0.059(4) 0.044(4) 0.006(3) -0.023(3) -0.006(3) 
C20 0.062(4) 0.048(3) 0.043(4) 0.005(3) -0.033(3) -0.015(3) 
C21 0.091(5) 0.081(5) 0.083(6) 0.021(5) -0.053(5) -0.042(5) 
C22 0.061(4) 0.082(5) 0.060(5) -0.007(5) -0.005(4) -0.030(4) 
C23 0.076(5) 0.066(5) 0.084(7) 0.003(5) 0.001(5) 0.039(4) 
C24 0.076(5) 0.093(6) 0.181(11) 0.068(7) 0.056(6) 0.047(5) 
S1 0.0467(8) 0.0542(9) 0.0395(9) 0.0048(8) -0.0177(8) -0.0093(7) 
S2 0.0576(9) 0.0452(8) 0.0445(10) 0.0064(8) -0.0250(9) -0.0142(7) 
S3 0.0570(9) 0.0445(7) 0.0702(14) 0.0151(9) -0.0090(9) -0.0176(7) 
S4 0.0613(9) 0.0348(7) 0.0818(13) 0.0166(10) 0.0016(12) 0.0153(6) 
 
_geom_special_details 
; 
 All esds (except the esd in the dihedral angle between two l.s. planes) 
 are estimated using the full covariance matrix.  The cell esds are taken 
 into account individually in the estimation of esds in distances, angles 
 and torsion angles; correlations between esds in cell parameters are only 
 used when they are defined by crystal symmetry.  An approximate (isotropic) 
 treatment of cell esds is used for estimating esds involving l.s. planes. 
; 
 
loop_ 
 _geom_bond_atom_site_label_1 
 _geom_bond_atom_site_label_2 
 _geom_bond_distance 
 _geom_bond_site_symmetry_2 
 _geom_bond_publ_flag 
Zn1 O14 1.906(4) 2_765 ? 
Zn1 O3 1.953(4) . ? 
Zn1 O10 1.961(4) 2_765 ? 
Zn1 O7 1.986(5) . ? 
Zn2 O11 1.932(4) 3_564 ? 
Zn2 O15 1.961(4) 2_764 ? 
Zn2 O6 1.973(4) . ? 
Zn2 O1 2.138(4) 4_654 ? 
Zn2 O2 2.336(5) 4_654 ? 
Zn2 C4 2.526(6) 4_654 ? 
Zn3 O13 2.044(4) . ? 
Zn3 O13 2.044(4) 2_765 ? 
Zn3 O9 2.056(4) . ? 
Zn3 O9 2.056(4) 2_765 ? 
Zn3 O8 2.095(5) . ? 
Zn3 O8 2.095(5) 2_765 ? 
Zn4 O5 2.049(4) . ? 
Zn4 O5 2.049(4) 2_665 ? 
Zn4 O16 2.127(4) 1_454 ? 
Zn4 O16 2.127(4) 2_764 ? 
Zn4 O1 2.142(3) 4_654 ? 
Zn4 O1 2.142(3) 3_554 ? 
O1 C4 1.315(8) . ? 
O1 Zn2 2.138(4) 4_645 ? 
O1 Zn4 2.142(3) 3 ? 
O2 C4 1.239(9) . ? 
O2 Zn2 2.336(5) 4_645 ? 
O3 C22 1.180(9) . ? 
O4 C22 1.282(9) . ? 
O5 C2 1.247(7) . ? 
O6 C2 1.262(7) . ? 
O7 C3 1.231(8) . ? 
O8 C3 1.223(8) . ? 
O9 C14 1.210(7) . ? 
O10 C14 1.253(7) . ? 
O10 Zn1 1.961(4) 2_765 ? 
O11 C23 1.218(9) . ? 
O11 Zn2 1.932(4) 3_565 ? 
O12 C23 1.261(10) . ? 
O13 C6 1.254(8) . ? 
O14 C6 1.251(7) . ? 
O14 Zn1 1.906(4) 2_765 ? 
O15 C1 1.286(7) . ? 
O15 Zn2 1.961(4) 2_766 ? 
O16 C1 1.222(7) . ? 
O16 Zn4 2.127(4) 1_656 ? 
C1 C9 1.471(8) . ? 
C2 C19 1.475(8) . ? 
C3 C13 1.503(9) . ? 
C4 C16 1.467(8) . ? 
C4 Zn2 2.526(6) 4_645 ? 
C5 C7 1.341(9) . ? 
C5 C14 1.483(8) . ? 
C5 S4 1.710(5) . ? 
C6 C20 1.478(8) . ? 
C7 C24 1.395(9) . ? 
C7 H7A 0.9300 . ? 
C8 C19 1.351(8) . ? 
C8 C21 1.407(10) . ? 
C8 H8A 0.9300 . ? 
C9 C12 1.352(8) . ? 
C9 S2 1.721(6) . ? 
C10 C16 1.361(9) . ? 
C10 C17 1.408(9) . ? 
C10 H10A 0.9300 . ? 
C11 C20 1.352(8) . ? 
C11 C12 1.411(8) . ? 
C11 H11A 0.9300 . ? 
C12 H12A 0.9300 . ? 
C13 C21 1.329(8) . ? 
C13 S1 1.711(6) . ? 
C15 C17 1.364(10) . ? 
C15 C22 1.523(9) . ? 
C15 S3 1.675(7) . ? 
C16 S3 1.682(6) . ? 
C17 H17A 0.9300 . ? 
C18 C24 1.324(10) . ? 
C18 C23 1.532(8) . ? 
C18 S4 1.709(7) . ? 
C19 S1 1.722(6) . ? 
C20 S2 1.721(6) . ? 
C21 H21A 0.9300 . ? 
C24 H24A 0.9300 . ? 
 
loop_ 
 _geom_angle_atom_site_label_1 
 _geom_angle_atom_site_label_2 
 _geom_angle_atom_site_label_3 
 _geom_angle 
 _geom_angle_site_symmetry_1 
 _geom_angle_site_symmetry_3 
 _geom_angle_publ_flag 
O14 Zn1 O3 102.3(2) 2_765 . ? 
O14 Zn1 O10 123.6(2) 2_765 2_765 ? 
O3 Zn1 O10 106.91(19) . 2_765 ? 
O14 Zn1 O7 109.4(2) 2_765 . ? 
O3 Zn1 O7 100.9(2) . . ? 
O10 Zn1 O7 110.9(2) 2_765 . ? 
O11 Zn2 O15 104.1(2) 3_564 2_764 ? 
O11 Zn2 O6 99.3(2) 3_564 . ? 
O15 Zn2 O6 104.4(2) 2_764 . ? 
O11 Zn2 O1 134.61(19) 3_564 4_654 ? 
O15 Zn2 O1 116.55(16) 2_764 4_654 ? 
O6 Zn2 O1 89.78(18) . 4_654 ? 
O11 Zn2 O2 95.82(18) 3_564 4_654 ? 
O15 Zn2 O2 99.0(2) 2_764 4_654 ? 
O6 Zn2 O2 148.0(2) . 4_654 ? 
O1 Zn2 O2 59.98(17) 4_654 4_654 ? 
O11 Zn2 C4 113.72(19) 3_564 4_654 ? 
O15 Zn2 C4 114.1(2) 2_764 4_654 ? 
O6 Zn2 C4 119.2(3) . 4_654 ? 
O1 Zn2 C4 31.4(2) 4_654 4_654 ? 
O2 Zn2 C4 29.2(2) 4_654 4_654 ? 
O13 Zn3 O13 95.4(3) . 2_765 ? 
O13 Zn3 O9 90.9(2) . . ? 
O13 Zn3 O9 83.67(19) 2_765 . ? 
O13 Zn3 O9 83.67(19) . 2_765 ? 
O13 Zn3 O9 90.9(2) 2_765 2_765 ? 
O9 Zn3 O9 172.0(3) . 2_765 ? 
O13 Zn3 O8 172.6(2) . . ? 
O13 Zn3 O8 91.6(2) 2_765 . ? 
O9 Zn3 O8 87.9(2) . . ? 
O9 Zn3 O8 98.3(2) 2_765 . ? 
O13 Zn3 O8 91.6(2) . 2_765 ? 
O13 Zn3 O8 172.6(2) 2_765 2_765 ? 
O9 Zn3 O8 98.3(2) . 2_765 ? 
O9 Zn3 O8 87.9(2) 2_765 2_765 ? 
O8 Zn3 O8 81.3(3) . 2_765 ? 
O5 Zn4 O5 95.3(2) . 2_665 ? 
O5 Zn4 O16 169.37(15) . 1_454 ? 
O5 Zn4 O16 91.06(16) 2_665 1_454 ? 
O5 Zn4 O16 91.06(16) . 2_764 ? 
O5 Zn4 O16 169.36(15) 2_665 2_764 ? 
O16 Zn4 O16 84.0(3) 1_454 2_764 ? 
O5 Zn4 O1 87.88(15) . 4_654 ? 
O5 Zn4 O1 92.50(17) 2_665 4_654 ? 
O16 Zn4 O1 83.34(16) 1_454 4_654 ? 
O16 Zn4 O1 96.25(17) 2_764 4_654 ? 
O5 Zn4 O1 92.49(17) . 3_554 ? 
O5 Zn4 O1 87.88(15) 2_665 3_554 ? 
O16 Zn4 O1 96.25(17) 1_454 3_554 ? 
O16 Zn4 O1 83.34(16) 2_764 3_554 ? 
O1 Zn4 O1 179.4(3) 4_654 3_554 ? 
C4 O1 Zn2 90.9(4) . 4_645 ? 
C4 O1 Zn4 131.4(4) . 3 ? 
Zn2 O1 Zn4 103.49(16) 4_645 3 ? 
C4 O2 Zn2 84.0(4) . 4_645 ? 
C22 O3 Zn1 118.1(5) . . ? 
C2 O5 Zn4 132.1(4) . . ? 
C2 O6 Zn2 131.6(4) . . ? 
C3 O7 Zn1 114.6(4) . . ? 
C3 O8 Zn3 162.5(5) . . ? 
C14 O9 Zn3 143.9(5) . . ? 
C14 O10 Zn1 115.9(4) . 2_765 ? 
C23 O11 Zn2 112.9(5) . 3_565 ? 
C6 O13 Zn3 136.9(4) . . ? 
C6 O14 Zn1 136.2(4) . 2_765 ? 
C1 O15 Zn2 118.7(4) . 2_766 ? 
C1 O16 Zn4 147.0(4) . 1_656 ? 
O16 C1 O15 125.6(6) . . ? 
O16 C1 C9 118.0(5) . . ? 
O15 C1 C9 116.4(5) . . ? 
O5 C2 O6 128.2(6) . . ? 
O5 C2 C19 119.4(6) . . ? 
O6 C2 C19 112.4(5) . . ? 
O8 C3 O7 126.6(7) . . ? 
O8 C3 C13 116.7(7) . . ? 
O7 C3 C13 116.6(6) . . ? 
O2 C4 O1 122.9(5) . . ? 
O2 C4 C16 119.9(6) . . ? 
O1 C4 C16 117.1(7) . . ? 
O2 C4 Zn2 66.9(3) . 4_645 ? 
O1 C4 Zn2 57.8(3) . 4_645 ? 
C16 C4 Zn2 161.5(5) . 4_645 ? 
C7 C5 C14 128.2(5) . . ? 
C7 C5 S4 111.2(5) . . ? 
C14 C5 S4 120.6(5) . . ? 
O14 C6 O13 127.6(6) . . ? 
O14 C6 C20 115.9(5) . . ? 
O13 C6 C20 116.4(6) . . ? 
C5 C7 C24 112.4(6) . . ? 
C5 C7 H7A 123.8 . . ? 
C24 C7 H7A 123.8 . . ? 
C19 C8 C21 113.5(6) . . ? 
C19 C8 H8A 123.3 . . ? 
C21 C8 H8A 123.3 . . ? 
C12 C9 C1 128.2(6) . . ? 
C12 C9 S2 110.5(5) . . ? 
C1 C9 S2 121.3(4) . . ? 
C16 C10 C17 113.2(6) . . ? 
C16 C10 H10A 123.4 . . ? 
C17 C10 H10A 123.4 . . ? 
C20 C11 C12 112.7(6) . . ? 
C20 C11 H11A 123.6 . . ? 
C12 C11 H11A 123.6 . . ? 
C9 C12 C11 113.6(5) . . ? 
C9 C12 H12A 123.2 . . ? 
C11 C12 H12A 123.2 . . ? 
C21 C13 C3 127.7(6) . . ? 
C21 C13 S1 112.0(5) . . ? 
C3 C13 S1 120.3(5) . . ? 
O9 C14 O10 127.5(6) . . ? 
O9 C14 C5 116.4(6) . . ? 
O10 C14 C5 116.0(5) . . ? 
C17 C15 C22 129.9(7) . . ? 
C17 C15 S3 112.1(5) . . ? 
C22 C15 S3 117.8(6) . . ? 
C10 C16 C4 130.1(6) . . ? 
C10 C16 S3 110.7(5) . . ? 
C4 C16 S3 118.7(5) . . ? 
C15 C17 C10 111.0(7) . . ? 
C15 C17 H17A 124.5 . . ? 
C10 C17 H17A 124.5 . . ? 
C24 C18 C23 131.1(7) . . ? 
C24 C18 S4 111.0(5) . . ? 
C23 C18 S4 117.8(6) . . ? 
C8 C19 C2 128.3(6) . . ? 
C8 C19 S1 110.2(5) . . ? 
C2 C19 S1 121.5(4) . . ? 
C11 C20 C6 126.8(6) . . ? 
C11 C20 S2 110.9(5) . . ? 
C6 C20 S2 122.1(4) . . ? 
C13 C21 C8 112.7(6) . . ? 
C13 C21 H21A 123.6 . . ? 
C8 C21 H21A 123.6 . . ? 
O3 C22 O4 128.0(7) . . ? 
O3 C22 C15 117.8(7) . . ? 
O4 C22 C15 114.3(8) . . ? 
O11 C23 O12 128.6(7) . . ? 
O11 C23 C18 117.1(7) . . ? 
O12 C23 C18 114.3(8) . . ? 
C18 C24 C7 114.1(7) . . ? 
C18 C24 H24A 123.0 . . ? 
C7 C24 H24A 123.0 . . ? 
C13 S1 C19 91.5(3) . . ? 
C9 S2 C20 92.1(3) . . ? 
C15 S3 C16 92.9(3) . . ? 
C18 S4 C5 91.3(3) . . ? 
 
_diffrn_measured_fraction_theta_max    0.987 
_diffrn_reflns_theta_full              25.00 
_diffrn_measured_fraction_theta_full   0.987 
_refine_diff_density_max    0.510 
_refine_diff_density_min   -0.400 
_refine_diff_density_rms    0.081

loop_
  _platon_squeeze_void_nr
  _platon_squeeze_void_average_x
  _platon_squeeze_void_average_y
  _platon_squeeze_void_average_z
  _platon_squeeze_void_volume
  _platon_squeeze_void_count_electrons
         1    -0.023    -0.002     0.036    3100.9     206.0
_platon_squeeze_details
;
; 


#end

 
data_3 
 
_audit_creation_method            SHELXL-97 
_chemical_name_systematic 
; 
 ? 
; 
_chemical_name_common             ? 
_chemical_melting_point           ? 
_chemical_formula_moiety          ? 
_chemical_formula_sum 
 'C66 H58 N6 O38 S8 Zn7' 
_chemical_formula_weight          2257.48  
 
loop_ 
 _atom_type_symbol 
 _atom_type_description 
 _atom_type_scat_dispersion_real 
 _atom_type_scat_dispersion_imag 
 _atom_type_scat_source 
 'C'  'C'   0.0033   0.0016 
 'International Tables Vol C Tables 4.2.6.8 and 6.1.1.4' 
 'H'  'H'   0.0000   0.0000 
 'International Tables Vol C Tables 4.2.6.8 and 6.1.1.4' 
 'N'  'N'   0.0061   0.0033 
 'International Tables Vol C Tables 4.2.6.8 and 6.1.1.4' 
 'O'  'O'   0.0106   0.0060 
 'International Tables Vol C Tables 4.2.6.8 and 6.1.1.4' 
 'Zn'  'Zn'   0.2839   1.4301 
 'International Tables Vol C Tables 4.2.6.8 and 6.1.1.4' 
 'S'  'S'   0.1246   0.1234 
 'International Tables Vol C Tables 4.2.6.8 and 6.1.1.4' 
 
_symmetry_cell_setting            Triclinic 
_symmetry_space_group_name_H-M    P-1 
 
loop_ 
 _symmetry_equiv_pos_as_xyz 
 'x, y, z' 
 '-x, -y, -z' 
 
_cell_length_a                    15.5168(7) 
_cell_length_b                    16.7790(8) 
_cell_length_c                    18.7394(11) 
_cell_angle_alpha                 94.142(4) 
_cell_angle_beta                  113.527(5) 
_cell_angle_gamma                 110.215(4) 
_cell_volume                      4070.6(4) 
_cell_formula_units_Z             1 
_cell_measurement_temperature     293(2) 
_cell_measurement_reflns_used     4471 
_cell_measurement_theta_min       2.4354 
_cell_measurement_theta_max       25.6537 
 
_exptl_crystal_description        block 
_exptl_crystal_colour             colourless
_exptl_crystal_size_max           0.35 
_exptl_crystal_size_mid           0.2 
_exptl_crystal_size_min           0.15 
_exptl_crystal_density_meas       0.9209(1) 
_exptl_crystal_density_diffrn     0.921 
_exptl_crystal_density_method     'not measured' 
_exptl_crystal_F_000              1138 
_exptl_absorpt_coefficient_mu     1.165 
_exptl_absorpt_correction_type    'multi-scan' 
_exptl_absorpt_correction_T_min   0.72305 
_exptl_absorpt_correction_T_max   1.00000 
_exptl_absorpt_process_details    none 
 
_exptl_special_details 
; 
 ? 
; 
 
_diffrn_ambient_temperature       293(2) 
_diffrn_radiation_wavelength      0.71073 
_diffrn_radiation_type            MoK\a 
_diffrn_radiation_source          'Enhance (Mo) X-ray Source' 
_diffrn_radiation_monochromator   graphite 
_diffrn_measurement_device_type   'Xcalibur, Eos' 
_diffrn_measurement_method        '\w scans' 
_diffrn_detector_area_resol_mean  none  
_diffrn_standards_number          none 
_diffrn_standards_interval_count  none 
_diffrn_standards_interval_time   none 
_diffrn_standards_decay_%         none
_diffrn_reflns_number             14821 
_diffrn_reflns_av_R_equivalents   0.0375 
_diffrn_reflns_av_sigmaI/netI     0.0898 
_diffrn_reflns_limit_h_min        -16 
_diffrn_reflns_limit_h_max        15 
_diffrn_reflns_limit_k_min        -17 
_diffrn_reflns_limit_k_max        17 
_diffrn_reflns_limit_l_min        -15 
_diffrn_reflns_limit_l_max        19 
_diffrn_reflns_theta_min          2.44 
_diffrn_reflns_theta_max          22.00 
_reflns_number_total              9907 
_reflns_number_gt                 6168 
_reflns_threshold_expression      >2sigma(I) 
 
_computing_data_collection        'Bruker XSCANS' 
_computing_cell_refinement        'Bruker XSCANS' 
_computing_data_reduction         'Bruker SHELXTL' 
_computing_structure_solution     'SHELXS-97 (Sheldrick, 1990)' 
_computing_structure_refinement   'SHELXL-97 (Sheldrick, 1997)' 
_computing_molecular_graphics     'Bruker SHELXTL' 
_computing_publication_material   'Bruker SHELXTL' 
 
_refine_special_details 
; 
 Refinement of F^2^ against ALL reflections.  The weighted R-factor wR and 
 goodness of fit S are based on F^2^, conventional R-factors R are based 
 on F, with F set to zero for negative F^2^. The threshold expression of 
 F^2^ > 2sigma(F^2^) is used only for calculating R-factors(gt) etc. and is 
 not relevant to the choice of reflections for refinement.  R-factors based 
 on F^2^ are statistically about twice as large as those based on F, and R- 
 factors based on ALL data will be even larger. 
; 
 
_refine_ls_structure_factor_coef  Fsqd  
_refine_ls_matrix_type            full 
_refine_ls_weighting_scheme       calc  
_refine_ls_weighting_details 
 'calc w=1/[\s^2^(Fo^2^)+(0.0723P)^2^+0.0000P] where P=(Fo^2^+2Fc^2^)/3' 
_atom_sites_solution_primary      direct 
_atom_sites_solution_secondary    difmap 
_atom_sites_solution_hydrogens    geom 
_refine_ls_hydrogen_treatment     mixed 
_refine_ls_extinction_method      none 
_refine_ls_extinction_coef        ? 
_refine_ls_number_reflns          9907 
_refine_ls_number_parameters      565 
_refine_ls_number_restraints      0 
_refine_ls_R_factor_all           0.0793 
_refine_ls_R_factor_gt            0.0518 
_refine_ls_wR_factor_ref          0.1352 
_refine_ls_wR_factor_gt           0.1248 
_refine_ls_goodness_of_fit_ref    0.892 
_refine_ls_restrained_S_all       0.892 
_refine_ls_shift/su_max           0.001 
_refine_ls_shift/su_mean          0.000 
 
loop_ 
 _atom_site_label 
 _atom_site_type_symbol 
 _atom_site_fract_x 
 _atom_site_fract_y 
 _atom_site_fract_z 
 _atom_site_U_iso_or_equiv 
 _atom_site_adp_type 
 _atom_site_occupancy 
 _atom_site_symmetry_multiplicity 
 _atom_site_calc_flag 
 _atom_site_refinement_flags 
 _atom_site_disorder_assembly 
 _atom_site_disorder_group 
Zn1 Zn 0.5000 0.5000 0.5000 0.0360(2) Uani 1 2 d S . . 
Zn2 Zn 0.42982(5) 0.41057(4) 0.28820(4) 0.0429(2) Uani 1 1 d . . . 
Zn3 Zn 1.19115(4) 0.87693(4) 0.46624(4) 0.0452(2) Uani 1 1 d . . . 
Zn4 Zn 1.00845(5) 0.80840(4) 0.27560(4) 0.0454(2) Uani 1 1 d . . . 
S1 S 0.26838(13) 0.13098(10) 0.31983(10) 0.0610(5) Uani 1 1 d . . . 
S2 S 0.76722(11) 0.62936(11) 0.35886(10) 0.0603(5) Uani 1 1 d . . . 
S3 S 1.29331(11) 0.65218(9) 0.38312(9) 0.0498(4) Uani 1 1 d . . . 
S4 S 0.74845(13) 0.72240(12) -0.00409(10) 0.0678(5) Uani 1 1 d . . . 
O1 O 0.1095(3) -0.0817(2) 0.3637(2) 0.0516(11) Uani 1 1 d . . . 
O2 O 0.1259(4) -0.0575(3) 0.2549(3) 0.110(2) Uani 1 1 d . . . 
O3 O 0.3937(3) 0.3708(2) 0.4424(2) 0.0529(11) Uani 1 1 d . . . 
O4 O 0.3947(3) 0.3105(2) 0.3323(3) 0.0559(11) Uani 1 1 d . . . 
O5 O 0.6024(3) 0.4954(2) 0.4546(2) 0.0500(10) Uani 1 1 d . . . 
O6 O 0.5682(3) 0.5021(3) 0.3279(3) 0.0620(12) Uani 1 1 d . . . 
O7 O 0.9333(3) 0.7457(3) 0.3336(3) 0.0702(14) Uani 1 1 d . . . 
O8 O 1.0563(3) 0.7868(2) 0.4581(2) 0.0566(11) Uani 1 1 d . . . 
O9 O 0.9056(3) 0.7712(3) 0.1625(3) 0.0765(14) Uani 1 1 d . . . 
O10 O 0.8671(6) 0.8677(5) 0.2099(3) 0.164(3) Uani 1 1 d . . . 
O11 O 0.6269(3) 0.6397(3) -0.1749(2) 0.0666(12) Uani 1 1 d . . . 
O12 O 0.5085(4) 0.6924(4) -0.1999(3) 0.124(2) Uani 1 1 d . . . 
O13 O 1.4219(3) 0.5515(2) 0.4095(2) 0.0520(11) Uani 1 1 d . . . 
O14 O 1.3390(3) 0.4693(3) 0.2857(3) 0.0712(13) Uani 1 1 d . . . 
O15 O 1.2089(3) 0.7842(3) 0.3980(3) 0.0571(11) Uani 1 1 d . . . 
O16 O 1.0870(3) 0.7402(3) 0.2703(3) 0.0796(15) Uani 1 1 d . . . 
O17 O 1.3292(3) 0.9737(3) 0.4844(3) 0.0591(12) Uani 1 1 d . . . 
O18 O 1.2750(3) 0.8381(3) 0.5669(2) 0.0631(12) Uani 1 1 d . . . 
O19 O 1.1794(3) 0.9657(3) 0.5422(3) 0.0641(12) Uani 1 1 d . . . 
N1 N 1.3341(6) 0.7374(5) 0.6076(4) 0.102(2) Uani 1 1 d . . . 
N2 N 1.4847(4) 1.0800(4) 0.5668(4) 0.096(2) Uani 1 1 d . . . 
N3 N 1.1077(5) 0.9806(5) 0.6252(4) 0.093(2) Uani 1 1 d . . . 
C1 C 1.4378(7) 0.7990(8) 0.6599(8) 0.220(7) Uani 1 1 d . . . 
H1A H 1.4419 0.8575 0.6609 0.330 Uiso 1 1 calc R . . 
H1B H 1.4836 0.7907 0.6406 0.330 Uiso 1 1 calc R . . 
H1C H 1.4572 0.7900 0.7131 0.330 Uiso 1 1 calc R . . 
C2 C 1.5737(7) 1.1152(7) 0.6472(5) 0.176(5) Uani 1 1 d . . . 
H2A H 1.5572 1.0830 0.6836 0.263 Uiso 1 1 calc R . . 
H2B H 1.5902 1.1759 0.6659 0.263 Uiso 1 1 calc R . . 
H2C H 1.6319 1.1097 0.6443 0.263 Uiso 1 1 calc R . . 
C3 C 1.3181(10) 0.6487(7) 0.6012(6) 0.205(6) Uani 1 1 d . . . 
H3A H 1.2475 0.6122 0.5645 0.308 Uiso 1 1 calc R . . 
H3B H 1.3335 0.6362 0.6530 0.308 Uiso 1 1 calc R . . 
H3C H 1.3624 0.6372 0.5818 0.308 Uiso 1 1 calc R . . 
C4 C 1.1675(7) 0.6226(6) 0.2403(5) 0.139(4) Uani 1 1 d . . . 
H4A H 1.1166 0.6241 0.1931 0.167 Uiso 1 1 calc R . . 
C5 C 1.0685(8) 0.9421(7) 0.6802(6) 0.162(4) Uani 1 1 d . . . 
H5A H 1.0784 0.8891 0.6859 0.243 Uiso 1 1 calc R . . 
H5B H 0.9965 0.9293 0.6588 0.243 Uiso 1 1 calc R . . 
H5C H 1.1052 0.9829 0.7317 0.243 Uiso 1 1 calc R . . 
C6 C 1.2179(7) 0.5659(7) 0.2442(5) 0.158(5) Uani 1 1 d . . . 
H6A H 1.2034 0.5259 0.1996 0.189 Uiso 1 1 calc R . . 
C7 C 0.6889(9) 0.8194(8) 0.0531(5) 0.189(6) Uani 1 1 d . . . 
H7A H 0.6827 0.8565 0.0884 0.227 Uiso 1 1 calc R . . 
C8 C 1.4982(5) 1.1218(4) 0.5060(5) 0.092(3) Uani 1 1 d . . . 
H8A H 1.4361 1.0948 0.4564 0.138 Uiso 1 1 calc R . . 
H8B H 1.5540 1.1157 0.4993 0.138 Uiso 1 1 calc R . . 
H8C H 1.5137 1.1828 0.5216 0.138 Uiso 1 1 calc R . . 
C9 C 1.0999(8) 1.0620(6) 0.6091(5) 0.152(4) Uani 1 1 d . . . 
H9A H 1.1276 1.0799 0.5725 0.227 Uiso 1 1 calc R . . 
H9B H 1.1379 1.1066 0.6584 0.227 Uiso 1 1 calc R . . 
H9C H 1.0288 1.0533 0.5858 0.227 Uiso 1 1 calc R . . 
C10 C 0.7653(6) 0.7907(5) 0.0749(4) 0.099(3) Uani 1 1 d . . . 
C11 C 0.6392(6) 0.7310(5) -0.0691(4) 0.094(3) Uani 1 1 d . . . 
C12 C 0.6209(8) 0.7866(8) -0.0285(5) 0.181(6) Uani 1 1 d . . . 
H12A H 0.5662 0.8024 -0.0531 0.217 Uiso 1 1 calc R . . 
C13 C 0.8521(7) 0.8129(6) 0.1556(5) 0.094(3) Uani 1 1 d . . . 
C14 C 0.8092(5) 0.6274(4) 0.5020(4) 0.0645(19) Uani 1 1 d . . . 
H14A H 0.8043 0.6152 0.5482 0.077 Uiso 1 1 calc R . . 
C15 C 1.2012(5) 0.6732(4) 0.3114(4) 0.0642(18) Uani 1 1 d . . . 
C16 C 1.2877(5) 0.5755(4) 0.3178(4) 0.068(2) Uani 1 1 d . . . 
C17 C 0.5866(6) 0.6836(5) -0.1554(4) 0.080(2) Uani 1 1 d . . . 
C18 C 0.1441(5) -0.0311(4) 0.3258(5) 0.0613(18) Uani 1 1 d . . . 
C19 C 1.2646(5) 0.7632(5) 0.5649(4) 0.075(2) Uani 1 1 d . . . 
H19A H 1.2005 0.7198 0.5291 0.090 Uiso 1 1 calc R . . 
C20 C 1.4010(5) 1.0106(5) 0.5521(5) 0.083(2) Uani 1 1 d . . . 
H20A H 1.3959 0.9885 0.5950 0.100 Uiso 1 1 calc R . . 
C21 C 1.1465(6) 0.9419(5) 0.5904(5) 0.079(2) Uani 1 1 d . . . 
H21A H 1.1494 0.8903 0.6038 0.094 Uiso 1 1 calc R . . 
C22 C 0.2208(4) 0.1083(4) 0.4336(4) 0.0563(17) Uani 1 1 d . . . 
H22A H 0.1932 0.0820 0.4661 0.068 Uiso 1 1 calc R . . 
C23 C 0.8990(4) 0.6860(4) 0.5022(4) 0.0654(19) Uani 1 1 d . . . 
H23A H 0.9599 0.7170 0.5489 0.079 Uiso 1 1 calc R . . 
C24 C 1.3570(5) 0.5287(4) 0.3408(4) 0.0515(16) Uani 1 1 d . . . 
C25 C 0.2084(4) 0.0642(4) 0.3656(4) 0.0520(16) Uani 1 1 d . . . 
C26 C 0.6243(4) 0.5254(4) 0.4013(4) 0.0476(15) Uani 1 1 d . . . 
C27 C 0.8893(4) 0.6933(3) 0.4294(4) 0.0476(15) Uani 1 1 d . . . 
C28 C 1.1604(5) 0.7381(4) 0.3282(4) 0.0511(16) Uani 1 1 d . . . 
C29 C 0.3733(4) 0.3093(4) 0.3900(4) 0.0425(15) Uani 1 1 d . . . 
C30 C 0.7310(4) 0.5910(3) 0.4279(4) 0.0445(15) Uani 1 1 d . . . 
C31 C 0.9662(5) 0.7465(4) 0.4070(4) 0.0487(16) Uani 1 1 d . . . 
C32 C 0.3113(4) 0.2196(3) 0.3946(3) 0.0452(15) Uani 1 1 d . . . 
C33 C 0.2793(4) 0.1980(4) 0.4509(4) 0.0531(16) Uani 1 1 d . . . 
H33A H 0.2947 0.2382 0.4957 0.064 Uiso 1 1 calc R . . 
 
loop_ 
 _atom_site_aniso_label 
 _atom_site_aniso_U_11 
 _atom_site_aniso_U_22 
 _atom_site_aniso_U_33 
 _atom_site_aniso_U_23 
 _atom_site_aniso_U_13 
 _atom_site_aniso_U_12 
Zn1 0.0349(5) 0.0240(5) 0.0495(6) 0.0070(4) 0.0218(4) 0.0097(4) 
Zn2 0.0400(4) 0.0372(4) 0.0497(4) 0.0059(3) 0.0196(3) 0.0158(3) 
Zn3 0.0330(4) 0.0319(4) 0.0687(5) 0.0056(3) 0.0230(3) 0.0122(3) 
Zn4 0.0407(4) 0.0345(4) 0.0585(5) 0.0081(3) 0.0195(3) 0.0168(3) 
S1 0.0759(11) 0.0291(9) 0.0677(11) 0.0068(8) 0.0321(9) 0.0116(8) 
S2 0.0408(9) 0.0604(11) 0.0659(11) 0.0169(9) 0.0260(8) 0.0032(8) 
S3 0.0500(9) 0.0408(10) 0.0580(10) 0.0054(8) 0.0210(8) 0.0234(8) 
S4 0.0726(11) 0.0800(13) 0.0529(11) 0.0075(10) 0.0196(9) 0.0458(10) 
O1 0.050(2) 0.028(2) 0.073(3) 0.017(2) 0.026(2) 0.013(2) 
O2 0.162(5) 0.041(3) 0.088(4) -0.001(3) 0.059(4) -0.001(3) 
O3 0.053(2) 0.029(2) 0.069(3) -0.004(2) 0.033(2) 0.005(2) 
O4 0.066(3) 0.037(3) 0.071(3) 0.010(2) 0.041(2) 0.017(2) 
O5 0.040(2) 0.042(3) 0.087(3) 0.011(2) 0.047(2) 0.0157(19) 
O6 0.045(2) 0.057(3) 0.065(3) 0.010(3) 0.023(2) 0.003(2) 
O7 0.047(3) 0.068(3) 0.070(3) 0.024(3) 0.022(2) 0.000(2) 
O8 0.036(2) 0.051(3) 0.071(3) 0.017(2) 0.019(2) 0.010(2) 
O9 0.067(3) 0.088(4) 0.062(3) 0.017(3) 0.020(3) 0.029(3) 
O10 0.203(7) 0.191(7) 0.058(4) -0.031(4) 0.006(4) 0.113(6) 
O11 0.077(3) 0.071(3) 0.057(3) 0.007(2) 0.030(2) 0.039(3) 
O12 0.134(5) 0.193(6) 0.053(3) 0.016(4) 0.005(3) 0.122(5) 
O13 0.059(3) 0.048(3) 0.048(3) 0.013(2) 0.013(2) 0.033(2) 
O14 0.060(3) 0.077(3) 0.066(3) -0.010(3) 0.005(2) 0.050(3) 
O15 0.048(2) 0.051(3) 0.065(3) -0.001(2) 0.016(2) 0.027(2) 
O16 0.068(3) 0.091(4) 0.065(3) -0.008(3) -0.005(3) 0.063(3) 
O17 0.039(2) 0.044(3) 0.084(3) 0.004(2) 0.027(2) 0.009(2) 
O18 0.057(3) 0.051(3) 0.076(3) 0.021(3) 0.018(2) 0.029(2) 
O19 0.077(3) 0.048(3) 0.076(3) 0.013(2) 0.046(3) 0.022(2) 
N1 0.127(6) 0.102(6) 0.086(5) 0.037(4) 0.026(4) 0.083(5) 
N2 0.049(4) 0.076(5) 0.111(5) 0.004(4) 0.020(4) -0.009(4) 
N3 0.111(5) 0.097(5) 0.091(5) 0.007(4) 0.061(4) 0.053(4) 
C1 0.082(7) 0.276(16) 0.296(16) 0.143(14) 0.048(9) 0.096(9) 
C2 0.125(8) 0.161(10) 0.119(8) 0.003(8) 0.018(7) -0.025(7) 
C3 0.358(18) 0.167(11) 0.153(10) 0.060(9) 0.077(11) 0.218(13) 
C4 0.168(9) 0.163(9) 0.088(7) -0.008(6) 0.005(6) 0.142(8) 
C5 0.199(11) 0.198(12) 0.147(9) 0.050(9) 0.127(9) 0.086(9) 
C6 0.200(10) 0.211(11) 0.077(6) -0.027(7) 0.003(7) 0.182(10) 
C7 0.246(12) 0.291(14) 0.054(6) -0.023(7) 0.004(7) 0.224(12) 
C8 0.068(5) 0.070(6) 0.144(7) 0.038(5) 0.062(5) 0.016(4) 
C9 0.262(13) 0.161(10) 0.146(9) 0.062(8) 0.127(9) 0.168(10) 
C10 0.117(6) 0.131(7) 0.055(5) 0.007(5) 0.017(5) 0.084(6) 
C11 0.100(6) 0.126(7) 0.046(5) -0.011(5) 0.001(4) 0.080(5) 
C12 0.192(10) 0.271(14) 0.072(7) -0.031(8) -0.020(7) 0.195(11) 
C13 0.106(7) 0.093(7) 0.060(6) -0.004(5) 0.020(6) 0.043(6) 
C14 0.054(4) 0.077(5) 0.054(4) 0.018(4) 0.027(4) 0.014(4) 
C15 0.067(4) 0.065(5) 0.071(5) 0.000(4) 0.031(4) 0.043(4) 
C16 0.064(4) 0.075(5) 0.050(4) -0.007(4) -0.002(4) 0.047(4) 
C17 0.081(6) 0.110(7) 0.031(5) 0.009(4) 0.004(4) 0.048(5) 
C18 0.067(4) 0.032(4) 0.068(5) 0.004(4) 0.019(4) 0.017(4) 
C19 0.068(5) 0.084(6) 0.077(5) 0.022(5) 0.022(4) 0.049(5) 
C20 0.056(5) 0.073(6) 0.096(6) 0.014(5) 0.033(5) 0.003(4) 
C21 0.090(6) 0.059(5) 0.084(6) 0.009(5) 0.034(5) 0.035(5) 
C22 0.068(4) 0.028(4) 0.082(5) 0.013(4) 0.049(4) 0.011(3) 
C23 0.041(4) 0.069(5) 0.065(5) 0.014(4) 0.023(3) 0.002(3) 
C24 0.049(4) 0.045(4) 0.061(5) 0.011(4) 0.021(4) 0.024(3) 
C25 0.049(4) 0.027(4) 0.073(5) 0.011(3) 0.029(3) 0.007(3) 
C26 0.043(4) 0.039(4) 0.070(5) 0.005(4) 0.037(4) 0.015(3) 
C27 0.046(4) 0.039(4) 0.060(4) 0.015(3) 0.028(3) 0.013(3) 
C28 0.046(4) 0.042(4) 0.057(5) -0.006(4) 0.023(4) 0.014(3) 
C29 0.032(3) 0.036(4) 0.046(4) 0.006(3) 0.007(3) 0.013(3) 
C30 0.044(4) 0.032(3) 0.063(4) 0.011(3) 0.032(3) 0.012(3) 
C31 0.037(4) 0.035(4) 0.069(5) 0.013(4) 0.024(4) 0.010(3) 
C32 0.044(3) 0.029(3) 0.059(4) 0.013(3) 0.019(3) 0.015(3) 
C33 0.067(4) 0.033(4) 0.062(4) 0.011(3) 0.033(4) 0.019(3) 
 
_geom_special_details 
; 
 All esds (except the esd in the dihedral angle between two l.s. planes) 
 are estimated using the full covariance matrix.  The cell esds are taken 
 into account individually in the estimation of esds in distances, angles 
 and torsion angles; correlations between esds in cell parameters are only 
 used when they are defined by crystal symmetry.  An approximate (isotropic) 
 treatment of cell esds is used for estimating esds involving l.s. planes. 
; 
 
loop_ 
 _geom_bond_atom_site_label_1 
 _geom_bond_atom_site_label_2 
 _geom_bond_distance 
 _geom_bond_site_symmetry_2 
 _geom_bond_publ_flag 
Zn1 O3 2.086(4) 2_666 ? 
Zn1 O3 2.086(4) . ? 
Zn1 O13 2.094(4) 2_766 ? 
Zn1 O13 2.094(4) 1_455 ? 
Zn1 O5 2.100(4) 2_666 ? 
Zn1 O5 2.100(4) . ? 
Zn2 O4 1.931(4) . ? 
Zn2 O11 1.931(4) 2_665 ? 
Zn2 O6 1.950(4) . ? 
Zn2 O14 1.967(4) 1_455 ? 
Zn3 O8 2.053(4) . ? 
Zn3 O17 2.068(4) . ? 
Zn3 O19 2.090(4) . ? 
Zn3 O15 2.103(4) . ? 
Zn3 O18 2.116(4) . ? 
Zn3 O1 2.154(4) 1_665 ? 
Zn4 O16 1.961(4) . ? 
Zn4 O9 1.962(4) . ? 
Zn4 O7 1.994(4) . ? 
Zn4 O1 2.020(4) 1_665 ? 
Zn4 C18 2.589(6) 1_665 ? 
Zn4 C13 2.598(9) . ? 
S1 C32 1.700(6) . ? 
S1 C25 1.708(6) . ? 
S2 C30 1.689(5) . ? 
S2 C27 1.697(6) . ? 
S3 C16 1.665(6) . ? 
S3 C15 1.690(6) . ? 
S4 C10 1.677(8) . ? 
S4 C11 1.710(6) . ? 
O1 C18 1.259(7) . ? 
O1 Zn4 2.020(4) 1_445 ? 
O1 Zn3 2.154(4) 1_445 ? 
O2 C18 1.254(7) . ? 
O3 C29 1.230(6) . ? 
O4 C29 1.250(6) . ? 
O5 C26 1.262(6) . ? 
O6 C26 1.239(6) . ? 
O7 C31 1.260(6) . ? 
O8 C31 1.229(6) . ? 
O9 C13 1.234(9) . ? 
O10 C13 1.209(9) . ? 
O11 C17 1.235(8) . ? 
O11 Zn2 1.931(4) 2_665 ? 
O12 C17 1.234(7) . ? 
O13 C24 1.203(6) . ? 
O13 Zn1 2.094(4) 1_655 ? 
O14 C24 1.251(7) . ? 
O14 Zn2 1.967(4) 1_655 ? 
O15 C28 1.240(6) . ? 
O16 C28 1.235(6) . ? 
O17 C20 1.231(7) . ? 
O18 C19 1.207(7) . ? 
O19 C21 1.231(8) . ? 
N1 C19 1.294(7) . ? 
N1 C3 1.409(10) . ? 
N1 C1 1.437(11) . ? 
N2 C20 1.320(8) . ? 
N2 C8 1.428(8) . ? 
N2 C2 1.473(9) . ? 
N3 C21 1.315(9) . ? 
N3 C9 1.455(9) . ? 
N3 C5 1.475(9) . ? 
C1 H1A 0.9600 . ? 
C1 H1B 0.9600 . ? 
C1 H1C 0.9600 . ? 
C2 H2A 0.9600 . ? 
C2 H2B 0.9600 . ? 
C2 H2C 0.9600 . ? 
C3 H3A 0.9600 . ? 
C3 H3B 0.9600 . ? 
C3 H3C 0.9600 . ? 
C4 C15 1.320(9) . ? 
C4 C6 1.414(9) . ? 
C4 H4A 0.9300 . ? 
C5 H5A 0.9600 . ? 
C5 H5B 0.9600 . ? 
C5 H5C 0.9600 . ? 
C6 C16 1.325(9) . ? 
C6 H6A 0.9300 . ? 
C7 C10 1.356(10) . ? 
C7 C12 1.395(11) . ? 
C7 H7A 0.9300 . ? 
C8 H8A 0.9600 . ? 
C8 H8B 0.9600 . ? 
C8 H8C 0.9600 . ? 
C9 H9A 0.9600 . ? 
C9 H9B 0.9600 . ? 
C9 H9C 0.9600 . ? 
C10 C13 1.478(10) . ? 
C11 C12 1.336(10) . ? 
C11 C17 1.491(9) . ? 
C12 H12A 0.9300 . ? 
C14 C30 1.340(7) . ? 
C14 C23 1.399(7) . ? 
C14 H14A 0.9300 . ? 
C15 C28 1.506(8) . ? 
C16 C24 1.490(8) . ? 
C18 C25 1.497(8) . ? 
C18 Zn4 2.589(6) 1_445 ? 
C19 H19A 0.9300 . ? 
C20 H20A 0.9300 . ? 
C21 H21A 0.9300 . ? 
C22 C25 1.333(8) . ? 
C22 C33 1.395(7) . ? 
C22 H22A 0.9300 . ? 
C23 C27 1.332(7) . ? 
C23 H23A 0.9300 . ? 
C26 C30 1.484(7) . ? 
C27 C31 1.454(7) . ? 
C29 C32 1.511(7) . ? 
C32 C33 1.356(7) . ? 
C33 H33A 0.9300 . ? 
 
loop_ 
 _geom_angle_atom_site_label_1 
 _geom_angle_atom_site_label_2 
 _geom_angle_atom_site_label_3 
 _geom_angle 
 _geom_angle_site_symmetry_1 
 _geom_angle_site_symmetry_3 
 _geom_angle_publ_flag 
O3 Zn1 O3 180.000(1) 2_666 . ? 
O3 Zn1 O13 93.90(15) 2_666 2_766 ? 
O3 Zn1 O13 86.10(15) . 2_766 ? 
O3 Zn1 O13 86.10(15) 2_666 1_455 ? 
O3 Zn1 O13 93.90(15) . 1_455 ? 
O13 Zn1 O13 180.000(1) 2_766 1_455 ? 
O3 Zn1 O5 95.30(15) 2_666 2_666 ? 
O3 Zn1 O5 84.70(15) . 2_666 ? 
O13 Zn1 O5 94.56(15) 2_766 2_666 ? 
O13 Zn1 O5 85.44(15) 1_455 2_666 ? 
O3 Zn1 O5 84.70(15) 2_666 . ? 
O3 Zn1 O5 95.30(15) . . ? 
O13 Zn1 O5 85.44(15) 2_766 . ? 
O13 Zn1 O5 94.56(15) 1_455 . ? 
O5 Zn1 O5 180.000(1) 2_666 . ? 
O4 Zn2 O11 104.08(18) . 2_665 ? 
O4 Zn2 O6 124.78(17) . . ? 
O11 Zn2 O6 110.34(19) 2_665 . ? 
O4 Zn2 O14 107.88(18) . 1_455 ? 
O11 Zn2 O14 100.10(19) 2_665 1_455 ? 
O6 Zn2 O14 106.95(18) . 1_455 ? 
O8 Zn3 O17 174.78(17) . . ? 
O8 Zn3 O19 86.76(17) . . ? 
O17 Zn3 O19 88.47(17) . . ? 
O8 Zn3 O15 92.86(16) . . ? 
O17 Zn3 O15 91.71(16) . . ? 
O19 Zn3 O15 175.40(16) . . ? 
O8 Zn3 O18 89.50(15) . . ? 
O17 Zn3 O18 88.33(16) . . ? 
O19 Zn3 O18 89.66(17) . . ? 
O15 Zn3 O18 85.76(16) . . ? 
O8 Zn3 O1 91.97(14) . 1_665 ? 
O17 Zn3 O1 90.23(15) . 1_665 ? 
O19 Zn3 O1 90.74(16) . 1_665 ? 
O15 Zn3 O1 93.85(15) . 1_665 ? 
O18 Zn3 O1 178.49(15) . 1_665 ? 
O16 Zn4 O9 99.0(2) . . ? 
O16 Zn4 O7 102.3(2) . . ? 
O9 Zn4 O7 105.16(18) . . ? 
O16 Zn4 O1 106.27(16) . 1_665 ? 
O9 Zn4 O1 140.57(18) . 1_665 ? 
O7 Zn4 O1 98.49(18) . 1_665 ? 
O16 Zn4 C18 103.5(2) . 1_665 ? 
O9 Zn4 C18 116.4(2) . 1_665 ? 
O7 Zn4 C18 125.9(2) . 1_665 ? 
O1 Zn4 C18 28.43(18) 1_665 1_665 ? 
O16 Zn4 C13 126.1(3) . . ? 
O9 Zn4 C13 27.1(2) . . ? 
O7 Zn4 C13 97.9(2) . . ? 
O1 Zn4 C13 119.4(2) 1_665 . ? 
C18 Zn4 C13 103.6(2) 1_665 . ? 
C32 S1 C25 90.7(3) . . ? 
C30 S2 C27 92.7(3) . . ? 
C16 S3 C15 93.0(3) . . ? 
C10 S4 C11 94.2(4) . . ? 
C18 O1 Zn4 101.8(4) . 1_445 ? 
C18 O1 Zn3 129.4(4) . 1_445 ? 
Zn4 O1 Zn3 106.49(15) 1_445 1_445 ? 
C29 O3 Zn1 140.4(4) . . ? 
C29 O4 Zn2 125.1(4) . . ? 
C26 O5 Zn1 134.5(4) . . ? 
C26 O6 Zn2 117.9(4) . . ? 
C31 O7 Zn4 129.5(4) . . ? 
C31 O8 Zn3 138.1(4) . . ? 
C13 O9 Zn4 106.5(5) . . ? 
C17 O11 Zn2 116.7(4) . 2_665 ? 
C24 O13 Zn1 140.4(4) . 1_655 ? 
C24 O14 Zn2 126.0(4) . 1_655 ? 
C28 O15 Zn3 136.1(4) . . ? 
C28 O16 Zn4 125.2(4) . . ? 
C20 O17 Zn3 121.7(4) . . ? 
C19 O18 Zn3 122.7(5) . . ? 
C21 O19 Zn3 120.9(5) . . ? 
C19 N1 C3 123.7(8) . . ? 
C19 N1 C1 121.2(8) . . ? 
C3 N1 C1 114.9(8) . . ? 
C20 N2 C8 122.9(6) . . ? 
C20 N2 C2 121.2(7) . . ? 
C8 N2 C2 115.7(6) . . ? 
C21 N3 C9 120.9(7) . . ? 
C21 N3 C5 121.3(8) . . ? 
C9 N3 C5 117.7(7) . . ? 
N1 C1 H1A 109.5 . . ? 
N1 C1 H1B 109.5 . . ? 
H1A C1 H1B 109.5 . . ? 
N1 C1 H1C 109.5 . . ? 
H1A C1 H1C 109.5 . . ? 
H1B C1 H1C 109.5 . . ? 
N2 C2 H2A 109.5 . . ? 
N2 C2 H2B 109.5 . . ? 
H2A C2 H2B 109.5 . . ? 
N2 C2 H2C 109.5 . . ? 
H2A C2 H2C 109.5 . . ? 
H2B C2 H2C 109.5 . . ? 
N1 C3 H3A 109.5 . . ? 
N1 C3 H3B 109.5 . . ? 
H3A C3 H3B 109.5 . . ? 
N1 C3 H3C 109.5 . . ? 
H3A C3 H3C 109.5 . . ? 
H3B C3 H3C 109.5 . . ? 
C15 C4 C6 112.1(7) . . ? 
C15 C4 H4A 123.9 . . ? 
C6 C4 H4A 123.9 . . ? 
N3 C5 H5A 109.5 . . ? 
N3 C5 H5B 109.5 . . ? 
H5A C5 H5B 109.5 . . ? 
N3 C5 H5C 109.5 . . ? 
H5A C5 H5C 109.5 . . ? 
H5B C5 H5C 109.5 . . ? 
C16 C6 C4 113.3(7) . . ? 
C16 C6 H6A 123.4 . . ? 
C4 C6 H6A 123.4 . . ? 
C10 C7 C12 111.7(8) . . ? 
C10 C7 H7A 124.1 . . ? 
C12 C7 H7A 124.1 . . ? 
N2 C8 H8A 109.5 . . ? 
N2 C8 H8B 109.5 . . ? 
H8A C8 H8B 109.5 . . ? 
N2 C8 H8C 109.5 . . ? 
H8A C8 H8C 109.5 . . ? 
H8B C8 H8C 109.5 . . ? 
N3 C9 H9A 109.5 . . ? 
N3 C9 H9B 109.5 . . ? 
H9A C9 H9B 109.5 . . ? 
N3 C9 H9C 109.5 . . ? 
H9A C9 H9C 109.5 . . ? 
H9B C9 H9C 109.5 . . ? 
C7 C10 C13 127.2(8) . . ? 
C7 C10 S4 110.3(6) . . ? 
C13 C10 S4 122.5(6) . . ? 
C12 C11 C17 132.2(7) . . ? 
C12 C11 S4 107.9(6) . . ? 
C17 C11 S4 119.9(6) . . ? 
C11 C12 C7 115.8(7) . . ? 
C11 C12 H12A 122.1 . . ? 
C7 C12 H12A 122.1 . . ? 
O10 C13 O9 123.9(8) . . ? 
O10 C13 C10 121.1(9) . . ? 
O9 C13 C10 115.1(8) . . ? 
O10 C13 Zn4 77.5(5) . . ? 
O9 C13 Zn4 46.4(4) . . ? 
C10 C13 Zn4 161.3(7) . . ? 
C30 C14 C23 112.5(5) . . ? 
C30 C14 H14A 123.8 . . ? 
C23 C14 H14A 123.8 . . ? 
C4 C15 C28 125.3(6) . . ? 
C4 C15 S3 110.8(5) . . ? 
C28 C15 S3 123.8(5) . . ? 
C6 C16 C24 126.1(7) . . ? 
C6 C16 S3 110.7(5) . . ? 
C24 C16 S3 123.1(5) . . ? 
O12 C17 O11 126.7(7) . . ? 
O12 C17 C11 117.3(8) . . ? 
O11 C17 C11 116.0(6) . . ? 
O2 C18 O1 122.3(6) . . ? 
O2 C18 C25 118.0(6) . . ? 
O1 C18 C25 119.6(6) . . ? 
O2 C18 Zn4 73.1(4) . 1_445 ? 
O1 C18 Zn4 49.8(3) . 1_445 ? 
C25 C18 Zn4 166.1(5) . 1_445 ? 
O18 C19 N1 126.3(7) . . ? 
O18 C19 H19A 116.9 . . ? 
N1 C19 H19A 116.9 . . ? 
O17 C20 N2 123.3(7) . . ? 
O17 C20 H20A 118.3 . . ? 
N2 C20 H20A 118.3 . . ? 
O19 C21 N3 127.9(7) . . ? 
O19 C21 H21A 116.1 . . ? 
N3 C21 H21A 116.1 . . ? 
C25 C22 C33 113.0(6) . . ? 
C25 C22 H22A 123.5 . . ? 
C33 C22 H22A 123.5 . . ? 
C27 C23 C14 113.9(6) . . ? 
C27 C23 H23A 123.0 . . ? 
C14 C23 H23A 123.0 . . ? 
O13 C24 O14 128.1(6) . . ? 
O13 C24 C16 116.6(6) . . ? 
O14 C24 C16 115.3(6) . . ? 
C22 C25 C18 127.4(6) . . ? 
C22 C25 S1 112.2(4) . . ? 
C18 C25 S1 120.1(5) . . ? 
O6 C26 O5 126.9(5) . . ? 
O6 C26 C30 115.7(6) . . ? 
O5 C26 C30 117.2(6) . . ? 
C23 C27 C31 128.9(6) . . ? 
C23 C27 S2 110.0(4) . . ? 
C31 C27 S2 121.1(5) . . ? 
O16 C28 O15 129.5(6) . . ? 
O16 C28 C15 115.8(6) . . ? 
O15 C28 C15 114.7(6) . . ? 
O3 C29 O4 129.2(5) . . ? 
O3 C29 C32 115.4(6) . . ? 
O4 C29 C32 115.3(6) . . ? 
C14 C30 C26 129.7(6) . . ? 
C14 C30 S2 110.8(4) . . ? 
C26 C30 S2 119.5(5) . . ? 
O8 C31 O7 124.8(5) . . ? 
O8 C31 C27 120.2(6) . . ? 
O7 C31 C27 115.1(5) . . ? 
C33 C32 C29 128.5(6) . . ? 
C33 C32 S1 112.1(4) . . ? 
C29 C32 S1 119.3(5) . . ? 
C32 C33 C22 112.0(6) . . ? 
C32 C33 H33A 124.0 . . ? 
C22 C33 H33A 124.0 . . ? 
 
_diffrn_measured_fraction_theta_max    0.991 
_diffrn_reflns_theta_full              22.00 
_diffrn_measured_fraction_theta_full   0.991 
_refine_diff_density_max    0.540 
_refine_diff_density_min   -0.496 
_refine_diff_density_rms    0.073 

loop_
  _platon_squeeze_void_nr
  _platon_squeeze_void_average_x
  _platon_squeeze_void_average_y
  _platon_squeeze_void_average_z
  _platon_squeeze_void_volume
  _platon_squeeze_void_count_electrons
         1    -0.022    -0.001     0.000    2245.5      -1.0
_platon_squeeze_details
;

;
# start Validation Reply Form
_vrf_THETM01_I
;
PROBLEM: The value of sine(theta_max)/wavelength is less than 0.550
RESPONSE: The crystal under investigation showed no significant intensity
above 0.95\A resolution.
;
_vrf_PLAT023_I
;
PROBLEM: Resolution (too) Low [sin(theta)/Lambda < 0.6]..      22.00 Deg. 
RESPONSE:  The crystal under investigation showed no significant intensity
above 0.95\A resolution.
;
# end Validation Reply Form
